# Supplementary material
Source: PubMed Central journal article supplement (PMC4184260)
Supplement: supp_btu416_supplementary_rev2.pdf [file supp_btu416_supplementary_rev2.pdf]

# Supplementary Note: Fast and accurate imputation of summary statistics enhances evidence of functional enrichment

## Correlation between statistics due to Linkage Disequilibrium

We consider two SNPs  $i$  and  $j$  tested for association in a genome-wide association study over a quantitative trait (similar derivations for case-control traits can be found here<sup>2,1,3</sup>). Let  $y_k$  denote the phenotypic value for individual  $k$  and let  $g_{i,k}$  denote the genotype (i.e. reference allele count 0,1,2) at SNP  $i$  and individual  $k$ . Let  $\vec{y}$  denote the  $(n \times 1)$  vector of phenotypes across the  $k$  individuals and let  $\vec{x}_i$  denote the  $(n \times 1)$  vector of normalized genotypes at SNP  $i$  such that  $\sum_k \vec{x}_i[k] = 0$  and  $\frac{1}{n} \vec{x}_i' \vec{x}_i = 1$ . We assume that

$$\vec{y} = \mu + \vec{e}$$

where  $\mu$  is the mean phenotype value and  $\vec{e} \sim \mathcal{N}(0, \sigma^2 I)$ , where  $I$  is the identity matrix and  $\sigma$  is a scalar.

A standard test for association at SNP  $i$  (z-score) is

$$Z_i = \frac{\vec{x}_i' \vec{y}}{\sqrt{n\sigma}}$$

Under null model of no association of SNP  $i$  and the phenotype  $y$ ,  $Z_i$  is well approximated at large sample sizes by a normal distribution  $\mathcal{N}(0, 1)$ . Similarly we can write a test of association at SNP  $j$  as

$$Z_j = \frac{\vec{x}_j' \vec{y}}{\sqrt{n\sigma}}$$

Therefore the covariance between  $Z_i$  and  $Z_j$  is:

$$Cov(Z_i, Z_j) = E[Z_i, Z_j] = E[E[Z_i, Z_j | \vec{x}_i, \vec{x}_j]]$$

with

$$E[Z_i, Z_j | \vec{x}_i, \vec{x}_j] = \frac{\vec{x}_i' \vec{x}_j}{n}$$

and

$$E\left[\frac{\vec{x}_i' \vec{x}_j}{n}\right] = r_{ij}$$

where  $r_{ij}$  is the sample correlation coefficient between SNPs  $i$  and  $j$ .

## References

1. Han, B., Kang, H. M., and Eskin, E. (2009). Rapid and accurate multiple testing correction and power estimation for millions of correlated markers. *PLoS genetics*, 5(4), e1000456.

2. Pritchard, J. K. and Przeworski, M. (2001). Linkage disequilibrium in humans: models and data. *The American Journal of Human Genetics*, **69**(1), 1–14.
3. Wen, X. and Stephens, M. (2010). Using linear predictors to impute allele frequencies from summary or pooled genotype data. *Ann. Appl. Stat.*, **4**(3), 1158–1182.

# 1 Supplementary Tables

Supplementary Table 1: Ratio of observed versus expected number of associations at different thresholds in null data simulations. 2.3M null GWAS were simulated by randomly selecting 1000 cases and 1000 controls from the random panel followed by imputation using the rest of the European haplotypes. Results displayed at various thresholds on confidence of imputed SNPs ( $r^2_{pred}$ ). Standard Error denoted in parenthesis.

| Method                                | 1E-01      | 1E-02      | 1E-03      | 1E-04      | 1E-5        |
|---------------------------------------|------------|------------|------------|------------|-------------|
| $r^2_{pred} > 0.3$ , 1.9M simulations |            |            |            |            |             |
| Typed                                 | 1.00(0.00) | 0.98(0.01) | 0.95(0.02) | 0.97(0.07) | 0.98(0.23)  |
| Beagle                                | 1.00(0.00) | 0.98(0.01) | 0.97(0.02) | 1.05(0.07) | 0.88(0.21)  |
| ImpG-Summary ( $\lambda=0.000$ )      | 1.05(0.00) | 1.26(0.01) | 1.97(0.03) | 4.61(0.15) | 16.66(0.93) |
| ImpG-Summary ( $\lambda=0.050$ )      | 0.94(0.00) | 0.93(0.01) | 1.04(0.02) | 1.37(0.09) | 2.67(0.38)  |
| ImpG-Summary ( $\lambda=0.100$ )      | 0.92(0.00) | 0.86(0.01) | 0.85(0.02) | 0.94(0.07) | 1.37(0.27)  |
| ImpG-Summary ( $\lambda=0.150$ )      | 0.88(0.00) | 0.80(0.01) | 0.76(0.02) | 0.74(0.06) | 1.13(0.25)  |
| ImpG-SummaryLD                        | 1.00(0.00) | 0.99(0.01) | 0.97(0.02) | 0.98(0.07) | 0.98(0.23)  |
| $r^2_{pred} > 0.6$ , 1.8M simulations |            |            |            |            |             |
| Typed                                 | 1.00(0.00) | 0.98(0.01) | 0.96(0.02) | 0.95(0.07) | 0.97(0.24)  |
| Beagle                                | 1.00(0.00) | 0.98(0.01) | 0.97(0.02) | 1.04(0.08) | 0.86(0.22)  |
| ImpG-Summary ( $\lambda=0.000$ )      | 1.04(0.00) | 1.19(0.01) | 1.74(0.03) | 3.81(0.15) | 13.52(0.88) |
| ImpG-Summary ( $\lambda=0.050$ )      | 0.95(0.00) | 0.92(0.01) | 0.97(0.02) | 1.18(0.08) | 2.04(0.35)  |
| ImpG-Summary ( $\lambda=0.100$ )      | 0.92(0.00) | 0.85(0.01) | 0.78(0.02) | 0.72(0.07) | 0.82(0.23)  |
| ImpG-Summary ( $\lambda=0.150$ )      | 0.89(0.00) | 0.80(0.01) | 0.75(0.02) | 0.70(0.07) | 1.09(0.27)  |
| ImpG-SummaryLD                        | 1.00(0.00) | 0.99(0.01) | 0.98(0.02) | 1.00(0.08) | 0.97(0.24)  |
| $r^2_{pred} > 0.9$ , 1.4M simulations |            |            |            |            |             |
| Typed                                 | 1.00(0.00) | 0.98(0.01) | 0.95(0.03) | 0.96(0.08) | 0.86(0.25)  |
| Beagle                                | 1.00(0.00) | 0.98(0.01) | 0.96(0.03) | 0.98(0.08) | 0.79(0.24)  |
| ImpG-Summary ( $\lambda=0.000$ )      | 1.03(0.00) | 1.13(0.01) | 1.50(0.03) | 2.95(0.15) | 10.06(0.85) |
| ImpG-Summary ( $\lambda=0.050$ )      | 0.96(0.00) | 0.89(0.01) | 0.84(0.03) | 0.68(0.09) | 0.47(0.23)  |
| ImpG-Summary ( $\lambda=0.100$ )      | 0.92(0.00) | 0.85(0.01) | 0.78(0.02) | 0.72(0.07) | 0.82(0.23)  |
| ImpG-Summary ( $\lambda=0.150$ )      | 0.89(0.00) | 0.80(0.01) | 0.75(0.02) | 0.70(0.07) | 1.09(0.27)  |
| ImpG-SummaryLD                        | 1.00(0.00) | 0.99(0.01) | 0.97(0.03) | 0.95(0.08) | 0.86(0.25)  |

Supplementary Table 2: Ratio of observed versus expected number of associations at different thresholds in null data simulations. 2.3M null GWAS were simulated by randomly selecting 1000 cases and 1000 controls from the GBR panel followed by imputation using the rest of the European haplotypes. Results displayed at confidently imputed SNPs ( $r^2_{pred} > 0.6$ ). Standard Error denoted in parenthesis.

| Method                                                        | 1E-01      | 1E-02      | 1E-03      | 1E-04      | 1E-05       |
|---------------------------------------------------------------|------------|------------|------------|------------|-------------|
| <i>r</i> <sup>2</sup> <sub>pred</sub> > 0.3, 1.9M simulations |            |            |            |            |             |
| Typed                                                         | 1.00(0.00) | 1.00(0.01) | 0.97(0.02) | 0.95(0.07) | 0.57(0.17)  |
| Beagle                                                        | 1.01(0.00) | 0.99(0.01) | 0.97(0.02) | 0.96(0.07) | 0.52(0.16)  |
| ImpG-Summary ( $\lambda=0.000$ )                              | 1.08(0.00) | 1.33(0.01) | 2.16(0.03) | 5.15(0.16) | 17.31(0.95) |
| ImpG-Summary ( $\lambda=0.050$ )                              | 0.95(0.00) | 0.96(0.01) | 1.08(0.02) | 1.48(0.09) | 3.38(0.43)  |
| ImpG-Summary ( $\lambda=0.100$ )                              | 0.91(0.00) | 0.87(0.01) | 0.94(0.02) | 1.21(0.08) | 1.88(0.32)  |
| ImpG-SummaryLD                                                | 1.00(0.00) | 0.99(0.01) | 0.97(0.02) | 0.95(0.07) | 0.73(0.19)  |
| <i>r</i> <sup>2</sup> <sub>pred</sub> > 0.6, 1.7M simulations |            |            |            |            |             |
| Typed                                                         | 1.00(0.00) | 1.00(0.01) | 0.97(0.02) | 0.95(0.07) | 0.57(0.18)  |
| Beagle                                                        | 1.01(0.00) | 1.00(0.01) | 0.97(0.02) | 0.96(0.07) | 0.57(0.18)  |
| ImpG-Summary ( $\lambda=0.000$ )                              | 1.06(0.00) | 1.25(0.01) | 1.92(0.03) | 4.24(0.16) | 12.73(0.85) |
| ImpG-Summary ( $\lambda=0.050$ )                              | 0.95(0.00) | 0.93(0.01) | 1.00(0.02) | 1.29(0.09) | 2.71(0.40)  |
| ImpG-Summary ( $\lambda=0.100$ )                              | 0.92(0.00) | 0.86(0.01) | 0.90(0.02) | 1.07(0.08) | 1.60(0.32)  |
| ImpG-SummaryLD                                                | 1.01(0.00) | 0.99(0.01) | 0.97(0.02) | 0.94(0.07) | 0.69(0.20)  |
| <i>r</i> <sup>2</sup> <sub>pred</sub> > 0.9, 1.4M simulations |            |            |            |            |             |
| Typed                                                         | 1.01(0.00) | 1.00(0.01) | 0.97(0.03) | 0.97(0.08) | 0.64(0.21)  |
| Beagle                                                        | 1.01(0.00) | 1.00(0.01) | 0.97(0.03) | 0.98(0.08) | 0.64(0.21)  |
| ImpG-Summary ( $\lambda=0.000$ )                              | 1.04(0.00) | 1.17(0.01) | 1.67(0.03) | 3.36(0.16) | 9.95(0.84)  |
| ImpG-Summary ( $\lambda=0.050$ )                              | 0.95(0.00) | 0.89(0.01) | 0.87(0.03) | 0.91(0.10) | 1.05(0.35)  |
| ImpG-Summary ( $\lambda=0.100$ )                              | 0.92(0.00) | 0.86(0.01) | 0.90(0.02) | 1.07(0.08) | 1.60(0.32)  |
| ImpG-SummaryLD                                                | 1.01(0.00) | 0.99(0.01) | 0.99(0.03) | 0.99(0.08) | 0.79(0.24)  |

Supplementary Table 3: Effective sample size decrease (ratio of imputed  $\chi^2$  to typed  $\chi^2$ ) in simulations at odds ratio 1.5. Results displayed at all imputed SNPs.

| Method                           | All SNPs | > 5% SNPs | 1 – 5% SNPs |
|----------------------------------|----------|-----------|-------------|
| ImpG-Summary ( $\lambda=0.000$ ) | 0.875    | 0.889     | 0.659       |
| ImpG-Summary ( $\lambda=0.050$ ) | 0.842    | 0.859     | 0.572       |
| ImpG-Summary ( $\lambda=0.100$ ) | 0.823    | 0.841     | 0.539       |
| ImpG-Summary ( $\lambda=0.150$ ) | 0.808    | 0.826     | 0.518       |

Supplementary Table 4: WTCCC data set summary. After data merging, 459,446 SNPs were typed for each phenotype; 133,893 were removed in the QC step resulting in 325,553 SNPs used in imputation. For imputed data we applied the standard filtering based on imputation accuracy; for HMM we also removed SNPs that had more than 5% of imputed calls missing at a posterior confidence threshold of 0.9.

| Phenotype | Sample Size | Imputed SNPs (HMM) | Imputed SNPs (MVN) | Intersection HMM+MVN |
|-----------|-------------|--------------------|--------------------|----------------------|
|           |             | $r^2_{hat} > 0.6$  | $r^2_{pred} > 0.6$ |                      |
| BD        | 4806        | 4,790,856          | 6,468,537          | 4,384,152            |
| CAD       | 4864        | 4,790,049          | 6,468,961          | 4,384,110            |
| CD        | 4686        | 4,791,672          | 6,470,920          | 4,385,247            |
| HT        | 4890        | 4,790,303          | 6,468,101          | 4,383,711            |
| RA        | 4798        | 4,791,130          | 6,469,116          | 4,384,220            |
| T1D       | 4901        | 4,791,957          | 6,469,880          | 4,384,948            |
| T2D       | 4862        | 4,792,723          | 6,470,571          | 4,385,825            |

Supplementary Table 5: Association statistics ( $z$ -scores) at imputed data using HMM or ImpG-Summary across the WTCCC and B58C data sets.

| Phenotype   | RsID       | Chr | HMM-Imputation | ImpG-Summary | $r^2_{hat}$ | $r^2_{pred}$ |
|-------------|------------|-----|----------------|--------------|-------------|--------------|
| BD (WTCCC)  | rs4650608  | 1   | 1.49           | 1.44         | 1.00        | 0.92         |
| BD (WTCCC)  | rs2271893  | 2   | 3.02           | 3.02         | 0.97        | 0.90         |
| BD (WTCCC)  | rs2727943  | 3   | -0.53          | -0.48        | 1.00        | 0.96         |
| BD (WTCCC)  | rs10994336 | 10  | -2.89          | -2.50        | 0.97        | 0.89         |
| BD (WTCCC)  | rs4948418  | 10  | -2.85          | -2.34        | 0.94        | 0.85         |
| BD (WTCCC)  | rs12576775 | 11  | -3.31          | -3.58        | 1.00        | 0.93         |
| BD (WTCCC)  | rs4765913  | 12  | 2.67           | 3.04         | 0.96        | 0.88         |
| BD (WTCCC)  | rs420259   | 16  | 3.65           | 3.40         | 1.00        | 0.92         |
| BD (WTCCC)  | rs1064395  | 19  | -1.91          | -1.79        | 1.00        | 0.93         |
| CAD (WTCCC) | rs17114036 | 1   | 2.65           | 1.94         | 0.98        | 0.90         |
| CAD (WTCCC) | rs599839   | 1   | -4.29          | -4.01        | 1.00        | 0.91         |
| CAD (WTCCC) | rs17465637 | 1   | -4.31          | -4.30        | 1.00        | 0.97         |
| CAD (WTCCC) | rs2123536  | 2   | 2.19           | 1.92         | 0.95        | 0.85         |
| CAD (WTCCC) | rs6725887  | 2   | -1.72          | -1.67        | 1.00        | 0.97         |
| CAD (WTCCC) | rs2306374  | 3   | -2.37          | -2.52        | 1.00        | 0.96         |
| CAD (WTCCC) | rs9818870  | 3   | -2.49          | -2.48        | 1.00        | 0.97         |
| CAD (WTCCC) | rs1842896  | 4   | -0.30          | -0.31        | 0.99        | 0.95         |
| CAD (WTCCC) | rs12526453 | 6   | 1.66           | 1.79         | 1.00        | 0.95         |
| CAD (WTCCC) | rs17609940 | 6   | 1.40           | 1.34         | 1.00        | 0.95         |
| CAD (WTCCC) | rs6922269  | 6   | -4.55          | -3.98        | 1.00        | 0.96         |
| CAD (WTCCC) | rs6601299  | 8   | -0.12          | 0.48         | 1.00        | 0.88         |
| CAD (WTCCC) | rs7865618  | 9   | -6.03          | -6.21        | 1.00        | 0.97         |
| CAD (WTCCC) | rs10757274 | 9   | -7.22          | -7.38        | 1.00        | 0.97         |
| CAD (WTCCC) | rs4977574  | 9   | -7.23          | -7.35        | 1.00        | 0.97         |
| CAD (WTCCC) | rs944797   | 9   | -7.09          | -7.26        | 0.98        | 0.94         |
| CAD (WTCCC) | rs1333049  | 9   | -7.70          | -7.49        | 1.00        | 0.95         |
| CAD (WTCCC) | rs3739998  | 10  | -2.73          | -2.71        | 1.00        | 0.94         |
| CAD (WTCCC) | rs1746048  | 10  | 3.06           | 2.98         | 1.00        | 0.98         |
| CAD (WTCCC) | rs974819   | 11  | 0.43           | 0.70         | 0.98        | 0.89         |
| CAD (WTCCC) | rs964184   | 11  | 2.41           | 2.27         | 0.99        | 0.93         |
| CAD (WTCCC) | rs7136259  | 12  | -0.48          | -0.37        | 1.00        | 0.95         |
| CAD (WTCCC) | rs4773144  | 13  | -1.40          | -1.49        | 0.98        | 0.84         |
| CAD (WTCCC) | rs1994016  | 15  | 3.84           | 3.80         | 1.00        | 0.92         |
| CAD (WTCCC) | rs4380028  | 15  | 3.47           | 3.32         | 0.98        | 0.92         |
| CAD (WTCCC) | rs3729639  | 16  | 0.32           | 0.25         | 1.00        | 0.97         |
| CAD (WTCCC) | rs1231206  | 17  | -2.10          | -2.19        | 0.99        | 0.95         |
| CAD (WTCCC) | rs216172   | 17  | -2.06          | -2.14        | 0.99        | 0.96         |
| CAD (WTCCC) | rs46522    | 17  | -2.94          | -2.91        | 1.00        | 0.97         |
| CAD (WTCCC) | rs11669133 | 19  | -0.55          | -0.57        | 1.00        | 0.96         |
| CAD (WTCCC) | rs1122608  | 19  | 3.07           | 2.94         | 1.00        | 0.96         |
| CAD (WTCCC) | rs9982601  | 21  | -3.18          | -2.94        | 0.97        | 0.80         |
| CD (WTCCC)  | rs2797685  | 1   | -2.86          | -2.64        | 1.00        | 0.94         |
| CD (WTCCC)  | rs11805303 | 1   | -7.04          | -6.80        | 1.00        | 0.93         |

| Phenotype  | RsID       | Chr | HMM-Imputation | ImpG-Summary | $r^2_{hat}$ | $r^2_{pred}$ |
|------------|------------|-----|----------------|--------------|-------------|--------------|
| CD (WTCCC) | rs7517847  | 1   | 7.93           | 7.14         | 0.98        | 0.86         |
| CD (WTCCC) | rs11465804 | 1   | 8.22           | 6.81         | 0.98        | 0.67         |
| CD (WTCCC) | rs2476601  | 1   | -3.33          | -3.35        | 0.99        | 0.87         |
| CD (WTCCC) | rs2274910  | 1   | -3.59          | -3.19        | 0.98        | 0.87         |
| CD (WTCCC) | rs9286879  | 1   | -3.88          | -3.74        | 1.00        | 0.96         |
| CD (WTCCC) | rs10801047 | 1   | 3.81           | 3.55         | 1.00        | 0.93         |
| CD (WTCCC) | rs1998598  | 1   | -2.15          | -2.45        | 0.98        | 0.76         |
| CD (WTCCC) | rs11584383 | 1   | 3.97           | 4.10         | 1.00        | 0.95         |
| CD (WTCCC) | rs3024505  | 1   | -0.74          | -0.63        | 1.00        | 0.92         |
| CD (WTCCC) | rs780093   | 2   | 4.32           | 4.17         | 1.00        | 0.89         |
| CD (WTCCC) | rs10495903 | 2   | -2.65          | -2.53        | 1.00        | 0.97         |
| CD (WTCCC) | rs10181042 | 2   | -3.35          | -3.31        | 1.00        | 0.93         |
| CD (WTCCC) | rs2058660  | 2   | 3.33           | 3.23         | 1.00        | 0.98         |
| CD (WTCCC) | rs6738825  | 2   | 1.07           | 0.92         | 1.00        | 0.98         |
| CD (WTCCC) | rs7423615  | 2   | -4.00          | -4.03        | 0.99        | 0.96         |
| CD (WTCCC) | rs10210302 | 2   | -7.47          | -6.92        | 1.00        | 0.93         |
| CD (WTCCC) | rs2241880  | 2   | -7.42          | -6.86        | 1.00        | 0.93         |
| CD (WTCCC) | rs3792109  | 2   | -7.41          | -6.96        | 0.98        | 0.90         |
| CD (WTCCC) | rs13073817 | 3   | -2.54          | -2.64        | 0.98        | 0.91         |
| CD (WTCCC) | rs9858542  | 3   | -4.85          | -4.75        | 1.00        | 0.96         |
| CD (WTCCC) | rs4613763  | 5   | -7.37          | -7.63        | 1.00        | 0.95         |
| CD (WTCCC) | rs17234657 | 5   | -7.46          | -7.63        | 1.00        | 0.95         |
| CD (WTCCC) | rs11742570 | 5   | -7.41          | -7.17        | 1.00        | 0.97         |
| CD (WTCCC) | rs1373692  | 5   | -7.07          | -7.09        | 1.00        | 0.96         |
| CD (WTCCC) | rs9292777  | 5   | -7.03          | -7.10        | 1.00        | 0.97         |
| CD (WTCCC) | rs7702331  | 5   | 1.77           | 1.34         | 0.99        | 0.87         |
| CD (WTCCC) | rs2549794  | 5   | 2.86           | 2.73         | 1.00        | 0.97         |
| CD (WTCCC) | rs7705924  | 5   | 0.59           | 0.22         | 0.97        | 0.88         |
| CD (WTCCC) | rs3091338  | 5   | -3.48          | -4.04        | 0.99        | 0.91         |
| CD (WTCCC) | rs2188962  | 5   | -5.47          | -5.64        | 0.99        | 0.92         |
| CD (WTCCC) | rs12521868 | 5   | -5.48          | -5.67        | 0.99        | 0.93         |
| CD (WTCCC) | rs11167764 | 5   | -3.55          | -3.35        | 0.98        | 0.92         |
| CD (WTCCC) | rs7714584  | 5   | -5.20          | -5.19        | 1.00        | 0.98         |
| CD (WTCCC) | rs10045431 | 5   | -4.59          | -4.57        | 0.97        | 0.79         |
| CD (WTCCC) | rs359457   | 5   | -2.60          | -2.14        | 0.99        | 0.94         |
| CD (WTCCC) | rs17309827 | 6   | 4.10           | 3.92         | 1.00        | 0.97         |
| CD (WTCCC) | rs6908425  | 6   | -4.53          | -4.39        | 1.00        | 0.95         |
| CD (WTCCC) | rs2301436  | 6   | -3.05          | -2.90        | 1.00        | 0.97         |
| CD (WTCCC) | rs12677663 | 8   | -1.43          | -1.16        | 1.00        | 0.92         |
| CD (WTCCC) | rs1551398  | 8   | -3.93          | -3.89        | 1.00        | 0.93         |
| CD (WTCCC) | rs6651252  | 8   | 2.87           | 2.91         | 1.00        | 0.98         |
| CD (WTCCC) | rs4263839  | 9   | -3.93          | -3.86        | 1.00        | 0.95         |
| CD (WTCCC) | rs12722489 | 10  | 2.14           | 1.89         | 1.00        | 0.93         |
| CD (WTCCC) | rs1819658  | 10  | 1.60           | 1.62         | 1.00        | 0.95         |
| CD (WTCCC) | rs7076156  | 10  | -2.55          | -2.71        | 1.00        | 0.97         |
| CD (WTCCC) | rs10761659 | 10  | -5.17          | -5.20        | 1.00        | 0.93         |
| CD (WTCCC) | rs224136   | 10  | 4.05           | 4.08         | 1.00        | 0.95         |

| Phenotype  | RsID       | Chr | HMM-Imputation | ImpG-Summary | $r^2_{hat}$ | $r^2_{pred}$ |
|------------|------------|-----|----------------|--------------|-------------|--------------|
| CD (WTCCC) | rs4409764  | 10  | 5.68           | 5.66         | 0.99        | 0.98         |
| CD (WTCCC) | rs10883365 | 10  | 5.64           | 5.62         | 1.00        | 0.98         |
| CD (WTCCC) | rs11190140 | 10  | 5.68           | 5.60         | 1.00        | 0.98         |
| CD (WTCCC) | rs102275   | 11  | -2.20          | -2.06        | 0.98        | 0.92         |
| CD (WTCCC) | rs7927894  | 11  | -3.29          | -3.29        | 1.00        | 0.93         |
| CD (WTCCC) | rs11175593 | 12  | -1.98          | -2.18        | 1.00        | 0.95         |
| CD (WTCCC) | rs11564258 | 12  | -2.04          | -2.12        | 1.00        | 0.98         |
| CD (WTCCC) | rs2062305  | 13  | 2.54           | 2.67         | 1.00        | 0.94         |
| CD (WTCCC) | rs8005161  | 14  | -3.94          | -3.56        | 1.00        | 0.84         |
| CD (WTCCC) | rs17221417 | 16  | -6.82          | -6.75        | 1.00        | 0.95         |
| CD (WTCCC) | rs5743289  | 16  | -7.88          | -7.95        | 0.97        | 0.68         |
| CD (WTCCC) | rs3091315  | 17  | 2.71           | 1.95         | 0.98        | 0.92         |
| CD (WTCCC) | rs3091316  | 17  | 2.70           | 1.95         | 0.98        | 0.92         |
| CD (WTCCC) | rs2872507  | 17  | -2.87          | -2.68        | 1.00        | 0.97         |
| CD (WTCCC) | rs744166   | 17  | 4.36           | 4.42         | 1.00        | 0.94         |
| CD (WTCCC) | rs2542151  | 18  | 5.39           | 5.64         | 1.00        | 0.94         |
| CD (WTCCC) | rs4809330  | 20  | -4.15          | -4.21        | 1.00        | 0.77         |
| CD (WTCCC) | rs1736135  | 21  | 2.96           | 2.78         | 1.00        | 0.98         |
| CD (WTCCC) | rs762421   | 21  | 3.35           | 3.29         | 1.00        | 0.98         |
| CD (WTCCC) | rs181359   | 22  | -2.22          | -2.03        | 1.00        | 0.97         |
| CD (WTCCC) | rs713875   | 22  | 2.70           | 2.82         | 0.98        | 0.89         |
| HT (WTCCC) | rs1173771  | 5   | -2.09          | -1.83        | 0.99        | 0.93         |
| HT (WTCCC) | rs1799945  | 6   | -2.57          | -2.23        | 0.99        | 0.87         |
| HT (WTCCC) | rs932764   | 10  | -2.01          | -2.11        | 0.99        | 0.94         |
| HT (WTCCC) | rs633185   | 11  | -2.60          | -2.12        | 0.99        | 0.90         |
| HT (WTCCC) | rs2681472  | 12  | 2.18           | 2.27         | 0.99        | 0.93         |
| HT (WTCCC) | rs13333226 | 16  | 0.73           | 0.80         | 1.00        | 0.91         |
| HT (WTCCC) | rs6015450  | 20  | -2.06          | -2.15        | 0.97        | 0.92         |
| RA (WTCCC) | rs6679677  | 1   | -10.59         | -10.23       | 1.00        | 0.92         |
| RA (WTCCC) | rs2476601  | 1   | 10.56          | 10.17        | 0.99        | 0.87         |
| RA (WTCCC) | rs13017599 | 2   | 0.38           | 0.10         | 0.98        | 0.85         |
| RA (WTCCC) | rs11900673 | 2   | -0.75          | -0.85        | 0.96        | 0.91         |
| RA (WTCCC) | rs934734   | 2   | 1.58           | 1.64         | 1.00        | 0.97         |
| RA (WTCCC) | rs11676922 | 2   | 3.53           | 3.55         | 0.98        | 0.93         |
| RA (WTCCC) | rs231735   | 2   | -0.96          | -0.92        | 0.99        | 0.97         |
| RA (WTCCC) | rs3087243  | 2   | 1.75           | 1.77         | 1.00        | 0.96         |
| RA (WTCCC) | rs874040   | 4   | -3.97          | -3.97        | 0.99        | 0.90         |
| RA (WTCCC) | rs657075   | 5   | -0.93          | -1.33        | 0.98        | 0.90         |
| RA (WTCCC) | rs12529514 | 6   | -1.38          | -1.54        | 0.91        | 0.52         |
| RA (WTCCC) | rs615672   | 6   | 10.69          | 10.19        | 1.00        | 0.91         |
| RA (WTCCC) | rs10499194 | 6   | 2.28           | 2.44         | 0.98        | 0.93         |
| RA (WTCCC) | rs6920220  | 6   | -4.56          | -4.37        | 1.00        | 0.92         |
| RA (WTCCC) | rs10488631 | 7   | -2.20          | -1.96        | 0.99        | 0.76         |
| RA (WTCCC) | rs2736340  | 8   | -2.66          | -2.43        | 1.00        | 0.96         |
| RA (WTCCC) | rs2812378  | 9   | 3.37           | 3.20         | 1.00        | 0.92         |
| RA (WTCCC) | rs881375   | 9   | -0.17          | -0.25        | 1.00        | 0.98         |
| RA (WTCCC) | rs3761847  | 9   | -0.44          | -0.28        | 1.00        | 0.96         |



| Phenotype   | RsID       | Chr | HMM-Imputation | ImpG-Summary | $r^2_{hat}$ | $r^2_{pred}$ |
|-------------|------------|-----|----------------|--------------|-------------|--------------|
| RA (WTCCC)  | rs706778   | 10  | -4.10          | -4.02        | 0.99        | 0.89         |
| RA (WTCCC)  | rs2847297  | 18  | -1.58          | -1.51        | 1.00        | 0.94         |
| RA (WTCCC)  | rs4810485  | 20  | -1.74          | -1.61        | 1.00        | 0.95         |
| T1D (WTCCC) | rs6679677  | 1   | -10.46         | -10.10       | 1.00        | 0.92         |
| T1D (WTCCC) | rs2476601  | 1   | 10.66          | 10.09        | 0.99        | 0.87         |
| T1D (WTCCC) | rs3024505  | 1   | 2.44           | 2.28         | 1.00        | 0.92         |
| T1D (WTCCC) | rs478222   | 2   | 2.42           | 2.34         | 0.99        | 0.94         |
| T1D (WTCCC) | rs3087243  | 2   | 4.13           | 4.20         | 1.00        | 0.96         |
| T1D (WTCCC) | rs10517086 | 4   | -2.98          | -3.17        | 0.98        | 0.88         |
| T1D (WTCCC) | rs9272346  | 6   | -24.68         | -24.36       | 1.00        | 0.91         |
| T1D (WTCCC) | rs11755527 | 6   | -2.72          | -2.93        | 1.00        | 0.96         |
| T1D (WTCCC) | rs9388489  | 6   | -2.59          | -2.60        | 1.00        | 0.96         |
| T1D (WTCCC) | rs7804356  | 7   | 0.72           | 0.62         | 1.00        | 0.97         |
| T1D (WTCCC) | rs4948088  | 7   | -2.70          | -2.61        | 1.00        | 0.91         |
| T1D (WTCCC) | rs7020673  | 9   | -3.12          | -3.00        | 1.00        | 0.97         |
| T1D (WTCCC) | rs61839660 | 10  | 5.43           | 5.58         | 0.97        | 0.75         |
| T1D (WTCCC) | rs12251307 | 10  | 4.15           | 4.16         | 1.00        | 0.92         |
| T1D (WTCCC) | rs947474   | 10  | -3.50          | -2.94        | 1.00        | 0.94         |
| T1D (WTCCC) | rs10509540 | 10  | 1.85           | 2.33         | 0.98        | 0.89         |
| T1D (WTCCC) | rs11171739 | 12  | 6.81           | 6.56         | 1.00        | 0.94         |
| T1D (WTCCC) | rs2292239  | 12  | 6.26           | 6.16         | 1.00        | 0.94         |
| T1D (WTCCC) | rs17696736 | 12  | -7.92          | -7.77        | 1.00        | 0.92         |
| T1D (WTCCC) | rs539514   | 13  | -2.23          | -2.28        | 0.99        | 0.87         |
| T1D (WTCCC) | rs1465788  | 14  | -2.27          | -2.00        | 1.00        | 0.95         |
| T1D (WTCCC) | rs4900384  | 14  | -2.20          | -2.04        | 1.00        | 0.96         |
| T1D (WTCCC) | rs3825932  | 15  | -3.34          | -3.11        | 1.00        | 0.92         |
| T1D (WTCCC) | rs12708716 | 16  | 5.32           | 5.35         | 1.00        | 0.96         |
| T1D (WTCCC) | rs2903692  | 16  | 5.17           | 5.03         | 0.97        | 0.91         |
| T1D (WTCCC) | rs4788084  | 16  | 2.71           | 2.38         | 0.99        | 0.91         |
| T1D (WTCCC) | rs2290400  | 17  | -1.66          | -1.60        | 0.99        | 0.94         |
| T1D (WTCCC) | rs7221109  | 17  | -4.22          | -4.00        | 1.00        | 0.94         |
| T1D (WTCCC) | rs2542151  | 18  | 4.63           | 4.72         | 1.00        | 0.94         |
| T1D (WTCCC) | rs1893217  | 18  | -4.74          | -4.62        | 1.00        | 0.89         |
| T1D (WTCCC) | rs425105   | 19  | 2.12           | 2.20         | 0.96        | 0.83         |
| T1D (WTCCC) | rs2281808  | 20  | -2.37          | -2.22        | 1.00        | 0.96         |
| T1D (WTCCC) | rs11203203 | 21  | -3.07          | -3.08        | 1.00        | 0.94         |
| T1D (WTCCC) | rs9976767  | 21  | -3.02          | -3.04        | 1.00        | 0.94         |
| T1D (WTCCC) | rs5753037  | 22  | -2.18          | -2.21        | 0.99        | 0.93         |
| T1D (WTCCC) | rs229541   | 22  | -3.40          | -3.20        | 1.00        | 0.96         |
| T2D (WTCCC) | rs7578597  | 2   | 2.23           | 2.12         | 1.00        | 0.98         |
| T2D (WTCCC) | rs243021   | 2   | -4.03          | -3.80        | 0.99        | 0.93         |
| T2D (WTCCC) | rs7593730  | 2   | -4.46          | -4.47        | 1.00        | 0.98         |
| T2D (WTCCC) | rs4607103  | 3   | 2.59           | 2.51         | 1.00        | 0.95         |
| T2D (WTCCC) | rs4402960  | 3   | -3.11          | -3.08        | 1.00        | 0.97         |
| T2D (WTCCC) | rs1470579  | 3   | -3.09          | -3.08        | 1.00        | 0.97         |
| T2D (WTCCC) | rs6769511  | 3   | -3.03          | -3.08        | 1.00        | 0.97         |
| T2D (WTCCC) | rs7656416  | 4   | 1.58           | 2.23         | 0.97        | 0.67         |

| Phenotype    | RsID       | Chr | HMM-Imputation | ImpG-Summary | $r^2_{hat}$ | $r^2_{pred}$ |
|--------------|------------|-----|----------------|--------------|-------------|--------------|
| T2D (WTCCC)  | rs6815464  | 4   | 1.82           | 1.89         | 1.00        | 0.94         |
| T2D (WTCCC)  | rs1801214  | 4   | -2.05          | -1.88        | 0.99        | 0.96         |
| T2D (WTCCC)  | rs4712523  | 6   | -4.23          | -4.15        | 0.99        | 0.97         |
| T2D (WTCCC)  | rs4712524  | 6   | -4.27          | -4.05        | 0.99        | 0.98         |
| T2D (WTCCC)  | rs10946398 | 6   | -4.13          | -4.05        | 1.00        | 0.98         |
| T2D (WTCCC)  | rs7754840  | 6   | -4.08          | -4.05        | 1.00        | 0.98         |
| T2D (WTCCC)  | rs7756992  | 6   | -5.39          | -4.73        | 0.97        | 0.89         |
| T2D (WTCCC)  | rs7766070  | 6   | -5.04          | -4.64        | 0.97        | 0.89         |
| T2D (WTCCC)  | rs9470794  | 6   | -0.01          | 0.12         | 0.99        | 0.94         |
| T2D (WTCCC)  | rs1535500  | 6   | -1.16          | -0.76        | 0.99        | 0.69         |
| T2D (WTCCC)  | rs1048886  | 6   | 0.46           | 0.39         | 1.00        | 0.96         |
| T2D (WTCCC)  | rs864745   | 7   | 3.79           | 3.73         | 1.00        | 0.95         |
| T2D (WTCCC)  | rs849134   | 7   | 3.91           | 3.73         | 0.99        | 0.94         |
| T2D (WTCCC)  | rs6467136  | 7   | 0.48           | 0.54         | 1.00        | 0.96         |
| T2D (WTCCC)  | rs972283   | 7   | -2.47          | -2.56        | 0.98        | 0.95         |
| T2D (WTCCC)  | rs515071   | 8   | -2.46          | -2.54        | 1.00        | 0.95         |
| T2D (WTCCC)  | rs896854   | 8   | 2.58           | 2.51         | 0.99        | 0.95         |
| T2D (WTCCC)  | rs7041847  | 9   | 1.39           | 1.32         | 0.99        | 0.96         |
| T2D (WTCCC)  | rs2383208  | 9   | 3.17           | 3.13         | 1.00        | 0.95         |
| T2D (WTCCC)  | rs10965250 | 9   | 3.40           | 3.21         | 0.99        | 0.95         |
| T2D (WTCCC)  | rs10811661 | 9   | 3.37           | 3.21         | 1.00        | 0.95         |
| T2D (WTCCC)  | rs1333051  | 9   | 3.29           | 3.28         | 1.00        | 0.94         |
| T2D (WTCCC)  | rs13292136 | 9   | 1.82           | 0.83         | 0.98        | 0.77         |
| T2D (WTCCC)  | rs10906115 | 10  | 1.51           | 1.36         | 1.00        | 0.94         |
| T2D (WTCCC)  | rs1802295  | 10  | -1.93          | -1.87        | 1.00        | 0.93         |
| T2D (WTCCC)  | rs1111875  | 10  | 4.62           | 3.90         | 0.98        | 0.83         |
| T2D (WTCCC)  | rs7901695  | 10  | -7.22          | -7.24        | 1.00        | 0.96         |
| T2D (WTCCC)  | rs4506565  | 10  | -7.17          | -7.18        | 1.00        | 0.97         |
| T2D (WTCCC)  | rs7903146  | 10  | -7.25          | -7.37        | 0.98        | 0.92         |
| T2D (WTCCC)  | rs2237892  | 11  | 1.88           | 1.95         | 0.94        | 0.64         |
| T2D (WTCCC)  | rs5215     | 11  | 3.19           | 3.18         | 1.00        | 0.94         |
| T2D (WTCCC)  | rs5219     | 11  | 3.27           | 3.18         | 0.99        | 0.94         |
| T2D (WTCCC)  | rs1552224  | 11  | 1.26           | 0.84         | 0.96        | 0.75         |
| T2D (WTCCC)  | rs7961581  | 12  | 4.67           | 4.65         | 1.00        | 0.93         |
| T2D (WTCCC)  | rs1359790  | 13  | 2.53           | 2.52         | 1.00        | 0.95         |
| T2D (WTCCC)  | rs7172432  | 15  | 0.47           | 0.59         | 0.99        | 0.87         |
| T2D (WTCCC)  | rs7178572  | 15  | -1.72          | -1.52        | 0.99        | 0.94         |
| T2D (WTCCC)  | rs2028299  | 15  | 0.74           | 0.98         | 0.99        | 0.93         |
| T2D (WTCCC)  | rs8042680  | 15  | -1.67          | -1.71        | 0.99        | 0.93         |
| T2D (WTCCC)  | rs8050136  | 16  | -5.66          | -5.36        | 1.00        | 0.98         |
| T2D (WTCCC)  | rs9939609  | 16  | -5.44          | -5.34        | 1.00        | 0.98         |
| T2D (WTCCC)  | rs3786897  | 19  | 0.39           | 0.18         | 0.98        | 0.78         |
| T2D (WTCCC)  | rs6017317  | 20  | -0.72          | -0.84        | 0.97        | 0.86         |
| Height(B58C) | rs425277   | 1   | -1.03          | -0.92        | 0.73        | 0.96         |
| Height(B58C) | rs2284746  | 1   | -2.19          | -2.30        | 0.67        | 0.91         |
| Height(B58C) | rs1738475  | 1   | 0.14           | 0.04         | 0.82        | 0.97         |
| Height(B58C) | rs4601530  | 1   | 1.52           | 1.76         | 0.85        | 0.95         |

| Phenotype    | RsID       | Chr | HMM-Imputation | ImpG-Summary | $r^2_{hat}$ | $r^2_{pred}$ |
|--------------|------------|-----|----------------|--------------|-------------|--------------|
| Height(B58C) | rs7532866  | 1   | 2.09           | 2.02         | 0.81        | 0.93         |
| Height(B58C) | rs2154319  | 1   | -3.42          | -3.67        | 0.76        | 0.91         |
| Height(B58C) | rs17391694 | 1   | -2.12          | -1.93        | 0.87        | 0.92         |
| Height(B58C) | rs6699417  | 1   | -1.90          | -2.01        | 0.88        | 0.98         |
| Height(B58C) | rs10874746 | 1   | -0.15          | -0.26        | 0.70        | 0.88         |
| Height(B58C) | rs9428104  | 1   | -2.53          | -2.03        | 0.66        | 0.94         |
| Height(B58C) | rs11205277 | 1   | -2.73          | -2.71        | 0.93        | 0.91         |
| Height(B58C) | rs17346452 | 1   | -2.32          | -2.32        | 0.75        | 0.95         |
| Height(B58C) | rs1325598  | 1   | -1.36          | -0.90        | 0.83        | 0.96         |
| Height(B58C) | rs1046934  | 1   | -2.62          | -2.63        | 0.87        | 0.97         |
| Height(B58C) | rs10863936 | 1   | 2.07           | 2.09         | 0.86        | 0.97         |
| Height(B58C) | rs6684205  | 1   | -2.76          | -2.88        | 0.80        | 0.98         |
| Height(B58C) | rs11118346 | 1   | 0.84           | 0.81         | 0.78        | 0.96         |
| Height(B58C) | rs10799445 | 1   | -0.02          | -0.30        | 0.90        | 0.96         |
| Height(B58C) | rs4665736  | 2   | -3.15          | -2.89        | 0.66        | 0.94         |
| Height(B58C) | rs6714546  | 2   | -3.78          | -3.19        | 0.74        | 0.92         |
| Height(B58C) | rs17511102 | 2   | -2.11          | -1.32        | 0.26        | 0.53         |
| Height(B58C) | rs2341459  | 2   | 2.31           | 2.37         | 0.92        | 0.97         |
| Height(B58C) | rs12474201 | 2   | -0.06          | 0.09         | 0.70        | 0.95         |
| Height(B58C) | rs3791675  | 2   | 2.77           | 3.15         | 0.71        | 0.94         |
| Height(B58C) | rs11684404 | 2   | 0.14           | -0.25        | 0.68        | 0.93         |
| Height(B58C) | rs7567288  | 2   | -0.13          | -0.91        | 0.57        | 0.91         |
| Height(B58C) | rs7567851  | 2   | -1.21          | -1.14        | 0.79        | 0.95         |
| Height(B58C) | rs1351164  | 2   | 2.73           | 2.78         | 0.63        | 0.94         |
| Height(B58C) | rs12470505 | 2   | -0.43          | -0.68        | 0.66        | 0.94         |
| Height(B58C) | rs2629046  | 2   | -0.89          | -1.38        | 0.78        | 0.94         |
| Height(B58C) | rs2580816  | 2   | 1.60           | 1.66         | 0.86        | 0.95         |
| Height(B58C) | rs12694997 | 2   | 0.61           | 0.61         | 0.94        | 0.96         |
| Height(B58C) | rs2597513  | 3   | 1.07           | 1.33         | 0.89        | 0.94         |
| Height(B58C) | rs13088462 | 3   | -0.69          | -1.39        | 0.23        | 0.91         |
| Height(B58C) | rs2336725  | 3   | 1.63           | 1.35         | 0.86        | 0.98         |
| Height(B58C) | rs9835332  | 3   | 1.37           | 1.49         | 0.79        | 0.96         |
| Height(B58C) | rs17806888 | 3   | 1.10           | 1.48         | 0.63        | 0.88         |
| Height(B58C) | rs9863706  | 3   | 3.23           | 3.20         | 0.59        | 0.90         |
| Height(B58C) | rs6439167  | 3   | -1.13          | -1.09        | 0.83        | 0.96         |
| Height(B58C) | rs9844666  | 3   | 2.12           | 1.92         | 0.95        | 0.95         |
| Height(B58C) | rs724016   | 3   | -3.40          | -3.59        | 0.83        | 0.94         |
| Height(B58C) | rs572169   | 3   | -2.62          | -3.35        | 0.86        | 0.96         |
| Height(B58C) | rs720390   | 3   | 0.09           | 0.29         | 0.70        | 0.91         |
| Height(B58C) | rs2247341  | 4   | -1.27          | -1.14        | 0.76        | 0.93         |
| Height(B58C) | rs6449353  | 4   | 4.48           | 4.48         | 0.73        | 0.95         |
| Height(B58C) | rs17081935 | 4   | -1.39          | -0.78        | 0.58        | 0.93         |
| Height(B58C) | rs7697556  | 4   | 1.10           | 1.37         | 0.73        | 0.93         |
| Height(B58C) | rs788867   | 4   | -5.13          | -5.39        | 0.77        | 0.95         |
| Height(B58C) | rs10010325 | 4   | -2.80          | -2.74        | 0.62        | 0.96         |
| Height(B58C) | rs7689420  | 4   | -1.46          | -1.78        | 0.74        | 0.94         |
| Height(B58C) | rs955748   | 4   | -0.81          | -0.92        | 0.96        | 0.96         |

| Phenotype    | RsID       | Chr | HMM-Imputation | ImpG-Summary | $r^2_{hat}$ | $r^2_{pred}$ |
|--------------|------------|-----|----------------|--------------|-------------|--------------|
| Height(B58C) | rs1173727  | 5   | 3.41           | 3.43         | 0.82        | 0.95         |
| Height(B58C) | rs11958779 | 5   | 2.37           | 2.52         | 0.77        | 0.94         |
| Height(B58C) | rs10037512 | 5   | 2.29           | 2.73         | 0.75        | 0.94         |
| Height(B58C) | rs13177718 | 5   | -0.09          | 0.36         | 0.94        | 0.94         |
| Height(B58C) | rs1582931  | 5   | 1.58           | 2.35         | 0.57        | 0.90         |
| Height(B58C) | rs274546   | 5   | -2.08          | -2.18        | 0.69        | 0.98         |
| Height(B58C) | rs526896   | 5   | 0.59           | -0.45        | 0.56        | 0.87         |
| Height(B58C) | rs4282339  | 5   | 1.70           | 1.93         | 0.85        | 0.96         |
| Height(B58C) | rs12153391 | 5   | 2.76           | 2.63         | 0.59        | 0.83         |
| Height(B58C) | rs889014   | 5   | 2.96           | 3.44         | 0.72        | 0.95         |
| Height(B58C) | rs422421   | 5   | -1.53          | -0.66        | 0.80        | 0.86         |
| Height(B58C) | rs6879260  | 5   | -2.46          | -2.60        | 0.63        | 0.89         |
| Height(B58C) | rs3812163  | 6   | -2.77          | -2.47        | 0.74        | 0.94         |
| Height(B58C) | rs1047014  | 6   | -1.96          | -1.75        | 0.94        | 0.93         |
| Height(B58C) | rs806794   | 6   | 1.53           | 1.90         | 0.69        | 0.91         |
| Height(B58C) | rs3129109  | 6   | -1.20          | -1.28        | 0.00        | 0.07         |
| Height(B58C) | rs2256183  | 6   | 3.33           | 3.71         | 0.00        | 0.44         |
| Height(B58C) | rs2780226  | 6   | 2.74           | 2.29         | 0.76        | 0.63         |
| Height(B58C) | rs9472414  | 6   | 1.38           | 1.74         | 0.80        | 0.97         |
| Height(B58C) | rs9360921  | 6   | -0.98          | -1.16        | 0.83        | 0.95         |
| Height(B58C) | rs310405   | 6   | -1.23          | -1.50        | 0.85        | 0.94         |
| Height(B58C) | rs7759938  | 6   | 2.14           | 2.12         | 0.69        | 0.97         |
| Height(B58C) | rs1046943  | 6   | -0.15          | -0.21        | 0.79        | 0.96         |
| Height(B58C) | rs961764   | 6   | -2.52          | -2.11        | 0.75        | 0.97         |
| Height(B58C) | rs1490384  | 6   | -4.23          | -4.39        | 0.72        | 0.94         |
| Height(B58C) | rs6569648  | 6   | 1.89           | 2.15         | 0.92        | 0.96         |
| Height(B58C) | rs7763064  | 6   | 2.43           | 2.75         | 0.69        | 0.96         |
| Height(B58C) | rs543650   | 6   | -3.42          | -3.53        | 0.88        | 0.94         |
| Height(B58C) | rs9456307  | 6   | 1.75           | 2.20         | 0.28        | 0.80         |
| Height(B58C) | rs798489   | 7   | 2.58           | 2.91         | 0.55        | 0.96         |
| Height(B58C) | rs4470914  | 7   | -0.89          | -0.63        | 0.78        | 0.96         |
| Height(B58C) | rs12534093 | 7   | 0.60           | 0.69         | 0.71        | 0.93         |
| Height(B58C) | rs1708299  | 7   | 3.32           | 3.05         | 0.78        | 0.95         |
| Height(B58C) | rs6959212  | 7   | -1.63          | -1.40        | 0.73        | 0.98         |
| Height(B58C) | rs42235    | 7   | -2.55          | -2.47        | 0.74        | 0.91         |
| Height(B58C) | rs822552   | 7   | -0.14          | -0.19        | 0.43        | 0.83         |
| Height(B58C) | rs2110001  | 7   | -0.32          | -0.38        | 0.68        | 0.94         |
| Height(B58C) | rs1013209  | 8   | 0.68           | 0.01         | 0.77        | 0.93         |
| Height(B58C) | rs7460090  | 8   | 3.67           | 3.50         | 0.64        | 0.90         |
| Height(B58C) | rs6473015  | 8   | -3.20          | -3.04        | 0.97        | 0.96         |
| Height(B58C) | rs6470764  | 8   | 4.57           | 4.49         | 0.80        | 0.97         |
| Height(B58C) | rs12680655 | 8   | 4.03           | 3.52         | 0.74        | 0.98         |
| Height(B58C) | rs7864648  | 9   | -0.93          | -0.71        | 0.88        | 0.94         |
| Height(B58C) | rs11144688 | 9   | 2.11           | 2.67         | 0.34        | 0.63         |
| Height(B58C) | rs7853377  | 9   | -1.24          | -1.84        | 0.54        | 0.90         |
| Height(B58C) | rs8181166  | 9   | -2.88          | -2.63        | 0.71        | 0.92         |
| Height(B58C) | rs2778031  | 9   | 1.08           | 1.81         | 0.78        | 0.95         |

| Phenotype    | RsID       | Chr | HMM-Imputation | ImpG-Summary | $r^2_{hat}$ | $r^2_{pred}$ |
|--------------|------------|-----|----------------|--------------|-------------|--------------|
| Height(B58C) | rs9969804  | 9   | 2.19           | 2.32         | 0.87        | 0.97         |
| Height(B58C) | rs1257763  | 9   | 1.83           | 2.29         | 0.29        | 0.63         |
| Height(B58C) | rs473902   | 9   | 2.51           | 0.44         | 0.15        | 0.41         |
| Height(B58C) | rs7027110  | 9   | -3.03          | -2.92        | 0.87        | 0.97         |
| Height(B58C) | rs1468758  | 9   | 2.36           | 2.00         | 0.53        | 0.92         |
| Height(B58C) | rs751543   | 9   | -2.19          | -1.94        | 0.49        | 0.72         |
| Height(B58C) | rs7466269  | 9   | 1.16           | 1.13         | 0.88        | 0.96         |
| Height(B58C) | rs7849585  | 9   | -1.00          | -0.91        | 0.70        | 0.89         |
| Height(B58C) | rs7909670  | 10  | 1.29           | 1.93         | 0.72        | 0.96         |
| Height(B58C) | rs2145998  | 10  | 1.56           | 1.55         | 0.76        | 0.96         |
| Height(B58C) | rs11599750 | 10  | 1.10           | 1.38         | 0.85        | 0.95         |
| Height(B58C) | rs2237886  | 11  | -1.26          | -1.40        | 0.96        | 0.92         |
| Height(B58C) | rs7926971  | 11  | -1.38          | -1.09        | 0.76        | 0.96         |
| Height(B58C) | rs1330     | 11  | -1.99          | -1.95        | 0.86        | 0.95         |
| Height(B58C) | rs10838801 | 11  | 1.11           | 1.50         | 0.70        | 0.93         |
| Height(B58C) | rs1814175  | 11  | 1.04           | 0.69         | 0.61        | 0.94         |
| Height(B58C) | rs3782089  | 11  | 0.17           | 0.51         | 0.52        | 0.79         |
| Height(B58C) | rs7112925  | 11  | 0.91           | 0.97         | 0.98        | 0.92         |
| Height(B58C) | rs634552   | 11  | 2.08           | 2.01         | 0.75        | 0.94         |
| Height(B58C) | rs494459   | 11  | -0.19          | -0.45        | 0.82        | 0.96         |
| Height(B58C) | rs654723   | 11  | -0.57          | -0.01        | 0.69        | 0.90         |
| Height(B58C) | rs2856321  | 12  | 1.99           | 2.09         | 0.85        | 0.97         |
| Height(B58C) | rs10770705 | 12  | 1.86           | 1.71         | 0.86        | 0.98         |
| Height(B58C) | rs2638953  | 12  | -1.60          | -2.50        | 0.76        | 0.98         |
| Height(B58C) | rs2066807  | 12  | -0.12          | -0.57        | 0.71        | 0.97         |
| Height(B58C) | rs1351394  | 12  | 3.30           | 3.17         | 0.74        | 0.94         |
| Height(B58C) | rs10748128 | 12  | -2.99          | -3.06        | 0.82        | 0.94         |
| Height(B58C) | rs11107116 | 12  | -2.59          | -2.66        | 0.88        | 0.96         |
| Height(B58C) | rs7971536  | 12  | 2.31           | 2.37         | 0.72        | 0.88         |
| Height(B58C) | rs11830103 | 12  | -1.51          | -1.55        | 0.55        | 0.92         |
| Height(B58C) | rs7332115  | 13  | -2.02          | -1.91        | 0.88        | 0.97         |
| Height(B58C) | rs3118905  | 13  | 3.30           | 3.97         | 0.81        | 0.95         |
| Height(B58C) | rs7319045  | 13  | 1.55           | 1.66         | 0.72        | 0.92         |
| Height(B58C) | rs1950500  | 14  | 2.67           | 2.51         | 0.96        | 0.95         |
| Height(B58C) | rs2093210  | 14  | 2.30           | 1.93         | 0.65        | 0.93         |
| Height(B58C) | rs1570106  | 14  | -0.09          | -0.71        | 0.78        | 0.96         |
| Height(B58C) | rs862034   | 14  | -2.22          | -2.25        | 0.73        | 0.94         |
| Height(B58C) | rs7155279  | 14  | 3.19           | 2.71         | 0.67        | 0.96         |
| Height(B58C) | rs16964211 | 15  | 2.23           | 2.18         | 0.83        | 0.96         |
| Height(B58C) | rs7178424  | 15  | 0.59           | 0.50         | 0.89        | 0.97         |
| Height(B58C) | rs10152591 | 15  | 1.60           | 1.73         | 0.94        | 0.96         |
| Height(B58C) | rs12902421 | 15  | -0.25          | -1.00        | 0.44        | 0.67         |
| Height(B58C) | rs5742915  | 15  | -0.90          | -0.56        | 0.90        | 0.92         |
| Height(B58C) | rs11259936 | 15  | -3.58          | -3.23        | 0.83        | 0.98         |
| Height(B58C) | rs16942341 | 15  | 0.36           | 2.09         | 0.30        | 0.55         |
| Height(B58C) | rs2871865  | 15  | 3.16           | 3.33         | 0.47        | 0.85         |
| Height(B58C) | rs4965598  | 15  | 3.27           | 3.34         | 0.73        | 0.93         |

| Phenotype    | RsID       | Chr | HMM-Imputation | ImpG-Summary | $r^2_{hat}$ | $r^2_{pred}$ |
|--------------|------------|-----|----------------|--------------|-------------|--------------|
| Height(B58C) | rs11648796 | 16  | -0.20          | -0.29        | 0.78        | 0.87         |
| Height(B58C) | rs26868    | 16  | -1.03          | -1.25        | 0.76        | 0.92         |
| Height(B58C) | rs1659127  | 16  | -3.37          | -3.01        | 0.72        | 0.86         |
| Height(B58C) | rs8052560  | 16  | -0.69          | -1.71        | 0.50        | 0.68         |
| Height(B58C) | rs4640244  | 17  | 1.44           | 1.32         | 0.86        | 0.92         |
| Height(B58C) | rs3110496  | 17  | -1.54          | -1.74        | 0.85        | 0.93         |
| Height(B58C) | rs3764419  | 17  | 0.57           | 1.02         | 0.55        | 0.93         |
| Height(B58C) | rs17780086 | 17  | 0.70           | 0.57         | 0.37        | 0.97         |
| Height(B58C) | rs1043515  | 17  | -3.03          | -2.61        | 0.74        | 0.93         |
| Height(B58C) | rs4986172  | 17  | 2.76           | 2.79         | 0.90        | 0.94         |
| Height(B58C) | rs2072153  | 17  | -1.33          | -1.19        | 0.66        | 0.96         |
| Height(B58C) | rs4605213  | 17  | -1.11          | -1.07        | 0.56        | 0.87         |
| Height(B58C) | rs227724   | 17  | -1.84          | -1.56        | 0.85        | 0.92         |
| Height(B58C) | rs2079795  | 17  | 1.21           | 0.96         | 0.79        | 0.95         |
| Height(B58C) | rs2665838  | 17  | -1.54          | -2.12        | 0.30        | 0.79         |
| Height(B58C) | rs11867479 | 17  | -0.63          | -0.91        | 0.91        | 0.93         |
| Height(B58C) | rs4800452  | 18  | -4.60          | -4.81        | 0.79        | 0.97         |
| Height(B58C) | rs9967417  | 18  | 1.21           | 1.91         | 0.55        | 0.90         |
| Height(B58C) | rs17782313 | 18  | -1.16          | -1.40        | 0.82        | 0.97         |
| Height(B58C) | rs12982744 | 19  | 0.08           | 0.22         | 0.75        | 0.91         |
| Height(B58C) | rs7507204  | 19  | -0.96          | -0.88        | 0.53        | 0.82         |
| Height(B58C) | rs891088   | 19  | -1.58          | -1.50        | 0.86        | 0.95         |
| Height(B58C) | rs4072910  | 19  | 1.46           | 1.18         | 0.53        | 0.81         |
| Height(B58C) | rs2279008  | 19  | 2.02           | 1.93         | 0.79        | 0.93         |
| Height(B58C) | rs17318596 | 19  | -2.16          | -2.25        | 0.85        | 0.95         |
| Height(B58C) | rs1741344  | 20  | 1.61           | 1.65         | 0.92        | 0.94         |
| Height(B58C) | rs2145272  | 20  | 2.37           | 2.96         | 0.78        | 0.95         |
| Height(B58C) | rs7274811  | 20  | 3.43           | 3.94         | 0.90        | 0.95         |
| Height(B58C) | rs143384   | 20  | -3.78          | -4.37        | 0.49        | 0.81         |
| Height(B58C) | rs237743   | 20  | -1.90          | -1.96        | 0.69        | 0.93         |
| Height(B58C) | rs2834442  | 21  | -2.04          | -2.28        | 0.80        | 0.95         |

Supplementary Table 6: Association statistics ( $\chi^2$ ) in the IHCS data at known associated SNPs on Chromosome 6 using several strategies for genotype calling from low coverage sequencing

| Position | Typed | Indep | Indep+MAF | ImpG-Seq | Beagle |
|----------|-------|-------|-----------|----------|--------|
| 30140525 | 0.29  | 3.79  | 3.21      | 0.22     | 0.58   |
| 30364508 | 0.77  | 0.86  | 0.20      | 0.55     | 0.61   |
| 30756066 | 0.01  | 0.27  | 0.20      | 1.15     | 0.06   |
| 30785273 | 0.53  | 0.33  | 0.18      | 2.10     | 0.25   |
| 30787593 | 0.53  | 2.10  | 2.45      | 1.45     | 0.61   |
| 30823630 | 1.32  | 0.78  | 2.34      | 0.32     | 1.68   |
| 30848253 | 4.15  | 0.84  | 1.08      | 0.35     | 3.15   |
| 30895990 | 2.34  | 0.56  | 0.80      | 0.56     | 2.85   |
| 30983683 | 2.49  | 0.63  | 0.66      | 0.06     | 2.20   |
| 31001143 | 2.74  | 0.26  | 0.74      | 0.59     | 3.00   |
| 31083813 | 0.40  | 1.12  | 1.05      | 1.12     | 0.31   |
| 31084435 | 0.71  | 1.66  | 1.86      | 0.15     | 0.77   |
| 31085770 | 4.11  | 0.55  | 0.24      | 0.15     | 4.30   |
| 31087934 | 0.40  | 0.77  | 0.77      | 0.20     | 0.31   |
| 31091862 | 0.71  | 0.63  | 0.07      | 1.49     | 0.74   |
| 31095801 | 1.55  | 0.49  | 0.18      | 0.33     | 1.58   |
| 31100942 | 0.29  | 2.15  | 1.99      | 1.03     | 0.71   |
| 31124849 | 0.04  | 0.51  | 0.34      | 1.96     | 0.01   |
| 31125777 | 0.06  | 0.98  | 0.82      | 1.69     | 0.00   |
| 31130593 | 1.61  | 0.73  | 0.45      | 2.52     | 1.85   |
| 31133943 | 1.68  | 0.72  | 1.07      | 2.99     | 1.82   |
| 31170514 | 0.16  | 0.38  | 0.38      | 0.03     | 0.04   |
| 31170528 | 0.09  | 1.58  | 1.58      | 0.81     | 0.06   |
| 31240692 | 4.15  | 0.94  | 1.05      | 0.56     | 4.27   |
| 31241032 | 0.43  | 0.55  | 0.41      | 1.59     | 0.16   |
| 31269173 | 3.99  | 0.22  | 0.09      | 5.31     | 6.10   |
| 31274380 | 5.70  | 0.43  | 0.42      | 2.32     | 8.08   |
| 31317347 | 4.86  | 0.32  | 0.00      | 0.66     | 3.30   |
| 31320538 | 1.51  | 1.73  | 1.62      | 2.99     | 0.58   |
| 31331829 | 1.95  | 0.38  | 0.27      | 0.45     | 2.02   |
| 31336568 | 0.05  | 0.00  | 0.06      | 0.00     | 0.08   |
| 31353593 | 8.84  | 0.02  | 0.03      | 0.02     | 10.91  |
| 31362930 | 8.84  | 2.91  | 2.17      | 2.53     | 8.25   |
| 31387557 | 3.88  | 5.13  | 6.27      | 10.32    | 4.15   |
| 31388214 | 3.57  | 0.39  | 0.42      | 8.32     | 4.03   |
| 31447588 | 4.74  | 0.07  | 1.19      | 0.90     | 3.65   |
| 31544189 | 2.41  | 1.07  | 1.24      | 0.68     | 1.48   |
| 31564821 | 0.45  | 0.03  | 0.05      | 0.03     | 1.00   |
| 31572927 | 0.48  | 0.30  | 0.15      | 0.01     | 1.45   |
| 31575276 | 0.48  | 2.05  | 1.64      | 2.05     | 1.45   |
| 31920873 | 0.21  | 0.02  | 0.13      | 0.36     | 0.23   |
| 32026808 | 0.01  | 0.63  | 0.30      | 0.43     | 0.53   |
| 32066765 | 0.00  | 1.23  | 1.57      | 1.23     | 0.01   |

| Position | Typed | Indep | Indep+MAF | ImpG-Seq | Beagle |
|----------|-------|-------|-----------|----------|--------|
| 32074804 | 0.01  | 0.39  | 0.03      | 0.39     | 0.00   |
| 32161324 | 1.68  | 0.01  | 0.06      | 0.00     | 0.40   |
| 32266506 | 0.89  | 0.17  | 1.04      | 0.03     | 1.68   |
| 32401327 | 0.89  | 2.05  | 2.48      | 0.09     | 0.71   |
| Average  | 1.85  | 0.93  | 0.96      | 1.34     | 1.96   |

| Method         | Odds Ratio                   |       |       |       |       |
|----------------|------------------------------|-------|-------|-------|-------|
|                | 1.0                          | 1.2   | 1.5   | 1.7   | 2.0   |
|                | All SNPs                     |       |       |       |       |
| Beagle         | 0.999                        | 0.892 | 0.872 | 0.870 | 0.868 |
| ImpG-Summary   | 0.937                        | 0.835 | 0.823 | 0.827 | 0.836 |
| ImpG-SummaryLD | 0.999                        | 0.872 | 0.851 | 0.852 | 0.855 |
| ImpG-Raw       | 0.999                        | 0.873 | 0.849 | 0.847 | 0.845 |
|                | Common SNPs ( over 5%)       |       |       |       |       |
| Beagle         | 0.999                        | 0.900 | 0.885 | 0.883 | 0.881 |
| ImpG-Summary   | 0.956                        | 0.850 | 0.841 | 0.845 | 0.855 |
| ImpG-SummaryLD | 0.999                        | 0.882 | 0.867 | 0.868 | 0.872 |
| ImpG-Raw       | 1.000                        | 0.883 | 0.865 | 0.863 | 0.861 |
|                | Low frequency SNPs (1 to 5%) |       |       |       |       |
| Beagle         | 0.997                        | 0.808 | 0.667 | 0.640 | 0.620 |
| ImpG-Summary   | 0.881                        | 0.685 | 0.539 | 0.512 | 0.491 |
| ImpG-SummaryLD | 0.997                        | 0.768 | 0.597 | 0.565 | 0.542 |
| ImpG-Raw       | 0.998                        | 0.768 | 0.596 | 0.564 | 0.540 |

Supplementary Table 7: Relative effective sample size at imputed SNPs (ratio of the average  $\chi^2$  association statistics attained at imputed versus typed SNPs) in simulated case-control studies at different effect sizes ( $R > 1$ ). The column corresponding to  $R=1$  shows the average  $\chi^2$  association statistic under the null model of no association. ImpG-Raw denotes Gaussian imputation with individual level data (see Main text).



| Method                       | Rand  | Great Britain |
|------------------------------|-------|---------------|
| All SNPs                     |       |               |
| Beagle                       | 0.872 | 0.868         |
| ImpG-Summary                 | 0.823 | 0.818         |
| ImpG-SummaryLD               | 0.851 | 0.845         |
| ImpG-Raw                     | 0.849 | 0.841         |
| Common SNPs ( over 5%)       |       |               |
| Beagle                       | 0.885 | 0.880         |
| ImpG-Summary                 | 0.841 | 0.835         |
| ImpG-SummaryLD               | 0.867 | 0.860         |
| ImpG-Raw                     | 0.865 | 0.857         |
| Low frequency SNPs (1 to 5%) |       |               |
| Beagle                       | 0.667 | 0.671         |
| ImpG-Summary                 | 0.539 | 0.549         |
| ImpG-SummaryLD               | 0.597 | 0.603         |
| ImpG-Raw                     | 0.596 | 0.598         |

Supplementary Table 8: Relative effective sample size at imputed SNPs (ratio of the average  $\chi^2$  association statistics attained at imputed versus typed SNPs) when imputation is performed in a random subsample of the 1000 Genomes European data or over only Great Britain haplotypes (odds ratio is set to 1.5). ImpG-Raw denotes Gaussian imputation with individual level data (see Main text).

| Phenotype         | GENIC | INTRON | INTERGENIC | All   |
|-------------------|-------|--------|------------|-------|
| HDL(before)       | 1.080 | 1.031  | 0.981      | 1.007 |
| HDL(after)        | 1.101 | 1.052  | 1.000      | 1.027 |
| HDL(1000G,before) | 1.030 | 0.960  | 0.916      | 0.937 |
| HDL(1000G,after)  | 1.124 | 1.048  | 1.000      | 1.023 |
| LDL(before)       | 1.068 | 1.031  | 0.975      | 1.002 |
| LDL(after)        | 1.095 | 1.058  | 1.000      | 1.027 |
| LDL(1000G,before) | 1.019 | 0.959  | 0.901      | 0.929 |
| LDL(1000G,after)  | 1.131 | 1.065  | 1.000      | 1.031 |
| TC(before)        | 1.083 | 1.031  | 0.972      | 1.002 |
| TC(after)         | 1.114 | 1.061  | 1.000      | 1.030 |
| TC(1000G,before)  | 1.034 | 0.966  | 0.905      | 0.934 |
| TC(1000G,after)   | 1.143 | 1.068  | 1.000      | 1.032 |
| TG(before)        | 1.059 | 1.040  | 0.966      | 1.002 |
| TG(after)         | 1.096 | 1.077  | 1.000      | 1.037 |
| TG(1000G,before)  | 1.007 | 0.968  | 0.893      | 0.926 |
| TG(1000G,after)   | 1.128 | 1.083  | 1.000      | 1.036 |

Supplementary Table 9: Genomic control before and after correction for inflation observed at intergenic set of SNPs.

| Phenotype  | GENIC    | INTRON   | All      |
|------------|----------|----------|----------|
| HDL        | 7.63E-05 | 2.87E-02 | 2.30E-01 |
| HDL(1000G) | 4.75E-08 | 1.69E-02 | 2.44E-01 |
| LDL        | 3.63E-04 | 5.02E-02 | 3.39E-01 |
| LDL(1000G) | 1.45E-06 | 1.73E-02 | 2.27E-01 |
| TC         | 4.85E-05 | 2.28E-02 | 2.51E-01 |
| TC(1000G)  | 1.33E-07 | 2.14E-02 | 2.01E-01 |
| TG         | 1.04E-04 | 7.62E-03 | 2.58E-01 |
| TG(1000G)  | 8.91E-07 | 7.10E-03 | 1.75E-01 |

Supplementary Table 10: Comparison between chi-square distribution to the INTERGENIC class of SNPs (-log10). Kolmogorov-Smirnov (KS) Tests statistic over 100 random draws each of 10,000 random SNPs across the genome was computed with median reported above. We note that the KS test used is known to be overly conservative when distributions differ only in the extreme tails.

## 2 Supplementary Figures

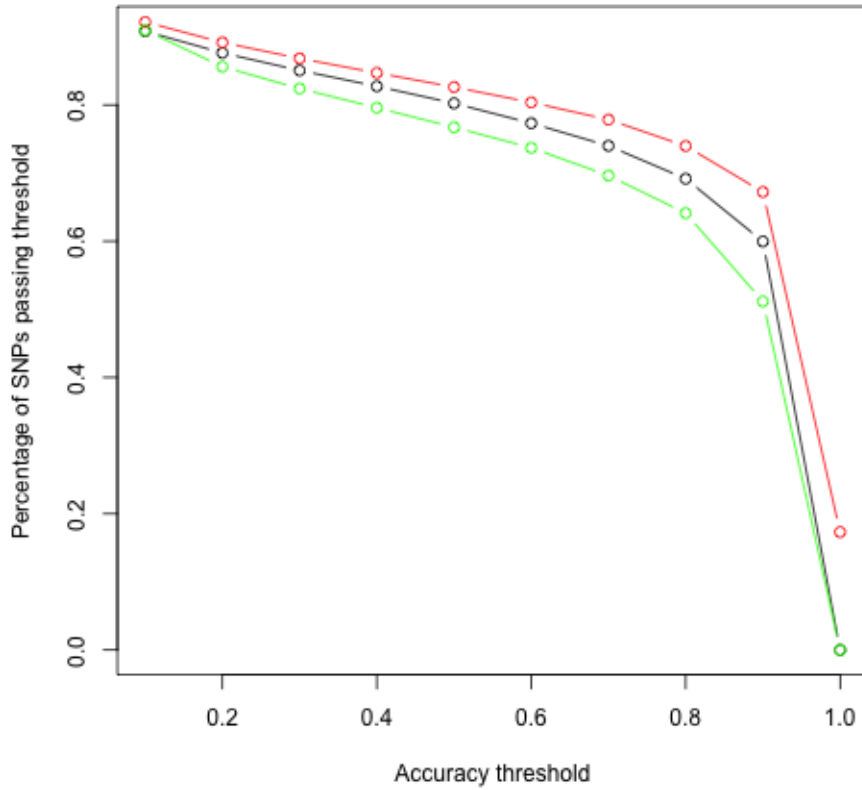

Supplementary Figure 1: Percentage of SNPs passing different thresholds on accuracy using the true accuracy ( $r^2$ , black), estimated under HMM ( $r^2_{hat}$ , red) and estimated from MVN ( $r^2_{pred}$ , green). We observe a Pearson correlation of 0.92 between  $r^2_{hat}$  and  $r^2$  as compared to 0.90 between  $r^2_{pred}$  and  $r^2$ . 77%, 80% respectively 74% of SNPs attain accuracy higher than 0.6 under the  $r^2$ ,  $r^2_{hat}$  or  $r^2_{pred}$  estimates of accuracy.

Variance unadjusted statistics (left), ImpG-SummaryLD (right)

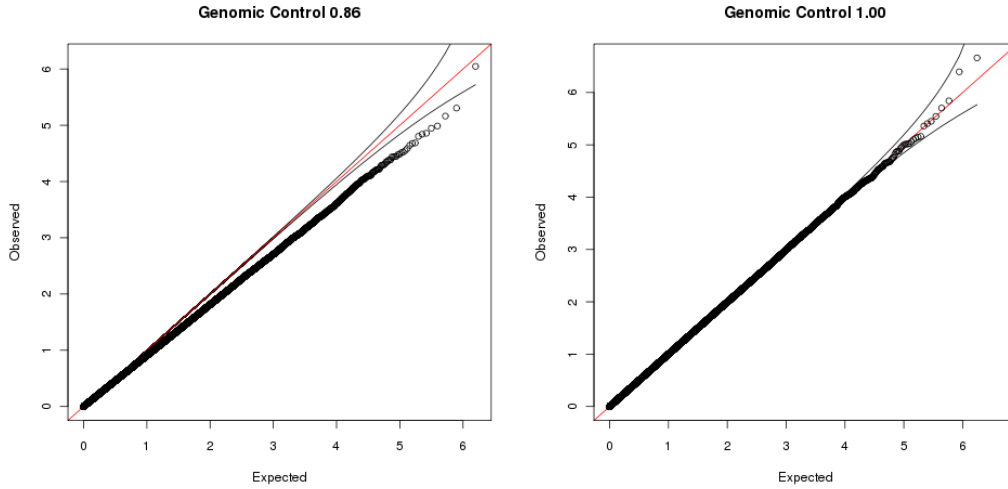

ImpG-Summary( $\lambda = 0.000$ ) (left), ImpG-Summary ( $\lambda = 0.100$ ) (right)

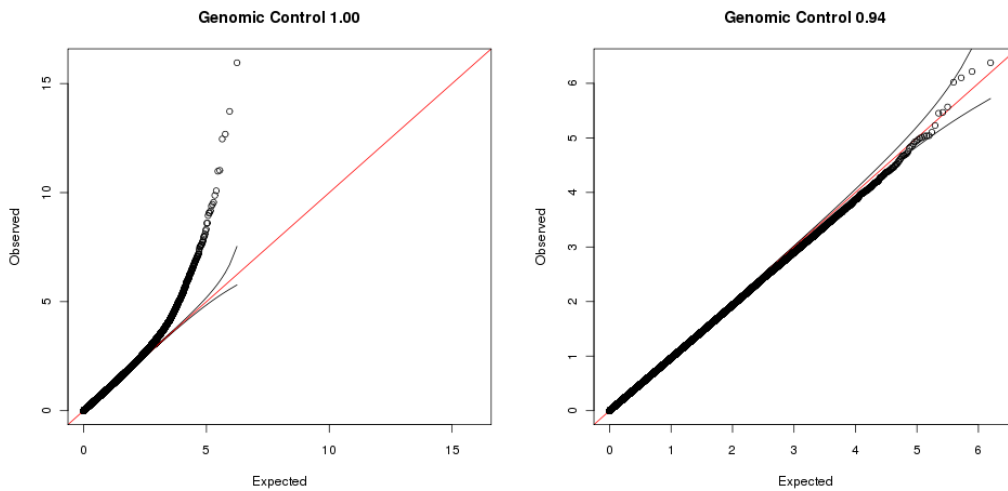

Supplementary Figure 2: Expected versus observed minus log 10 p-values in null simulations ( $R=1$ ) for Gaussian imputation from summary data. Top left denotes variance unadjusted statistics, top right denotes variance adjusted statistics using the LD matrix at typed variants inferred from the sample, bottom left denotes variance adjusted statistics using the LD matrix over typed variants inferred from reference panel while bottom right denotes statistics adjusted using LD learned from reference panels with the sample noise factor. All results displayed over confidently imputed statistics ( $r^2_{pred} > 0.6$ ).

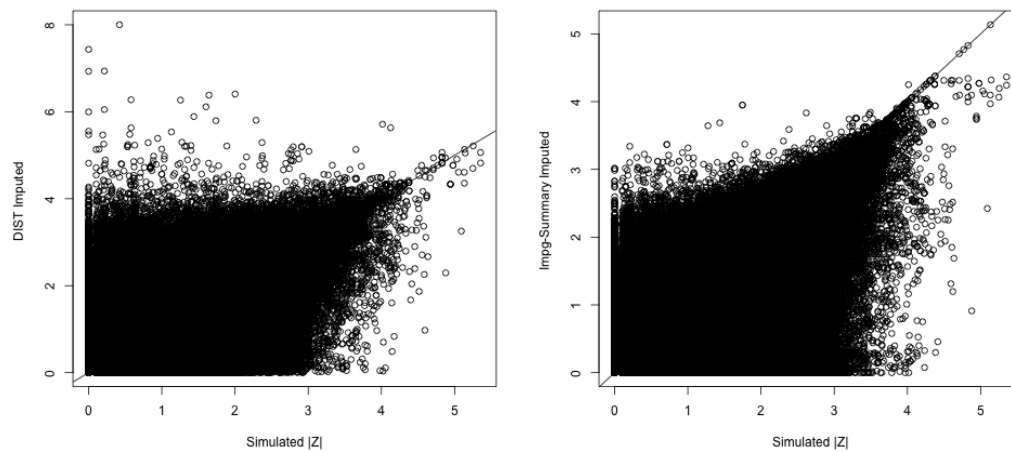

Supplementary Figure 3: Gaussian imputation results on null simulations from 1000 Genomes data. The 381 European samples were randomly split in half, with one half used as reference and the other half used to simulate case control data sets by randomly assigning case control labels (85 cases and 85 controls). SNPs present on the Illumina 610 platform and that attained a MAF > 5% in both cases and controls (464,897) were used to impute all variants polymorphic (MAF > 1% in the case-control data (5,961,997 in total) Left shows DIST (v0.1.4) results at an info score > 0.6 (5,620,505 in total) while right plots ImpG-Summary results at a  $r^2_{pred}$  > 0.6 score (5,469,489 in total).

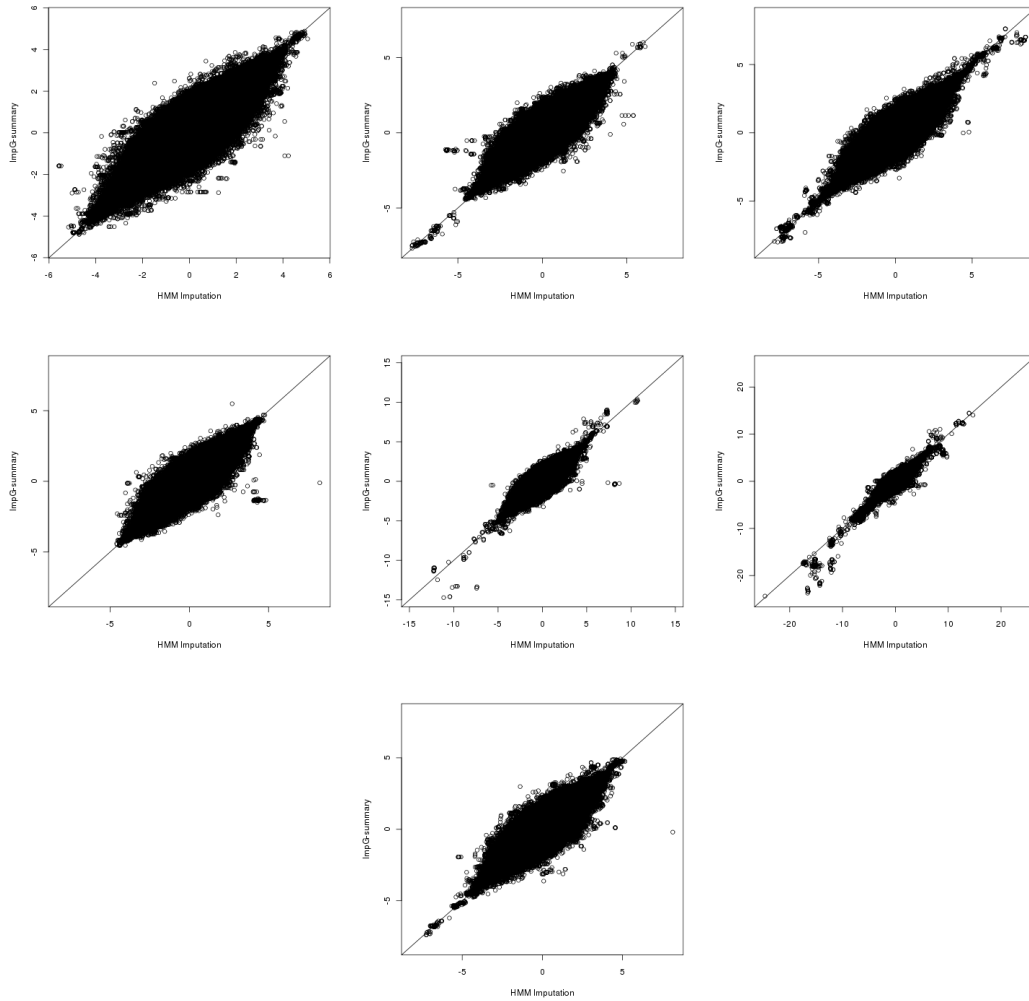

Supplementary Figure 4: HMM-imputed (x-axis) versus ImpG-summary (y-axis) association statistics (z-scores) of for all phenotypes in WTCCC Data. Data only at SNPs accurately called in both ImpG-Summary and HMM-imputation.

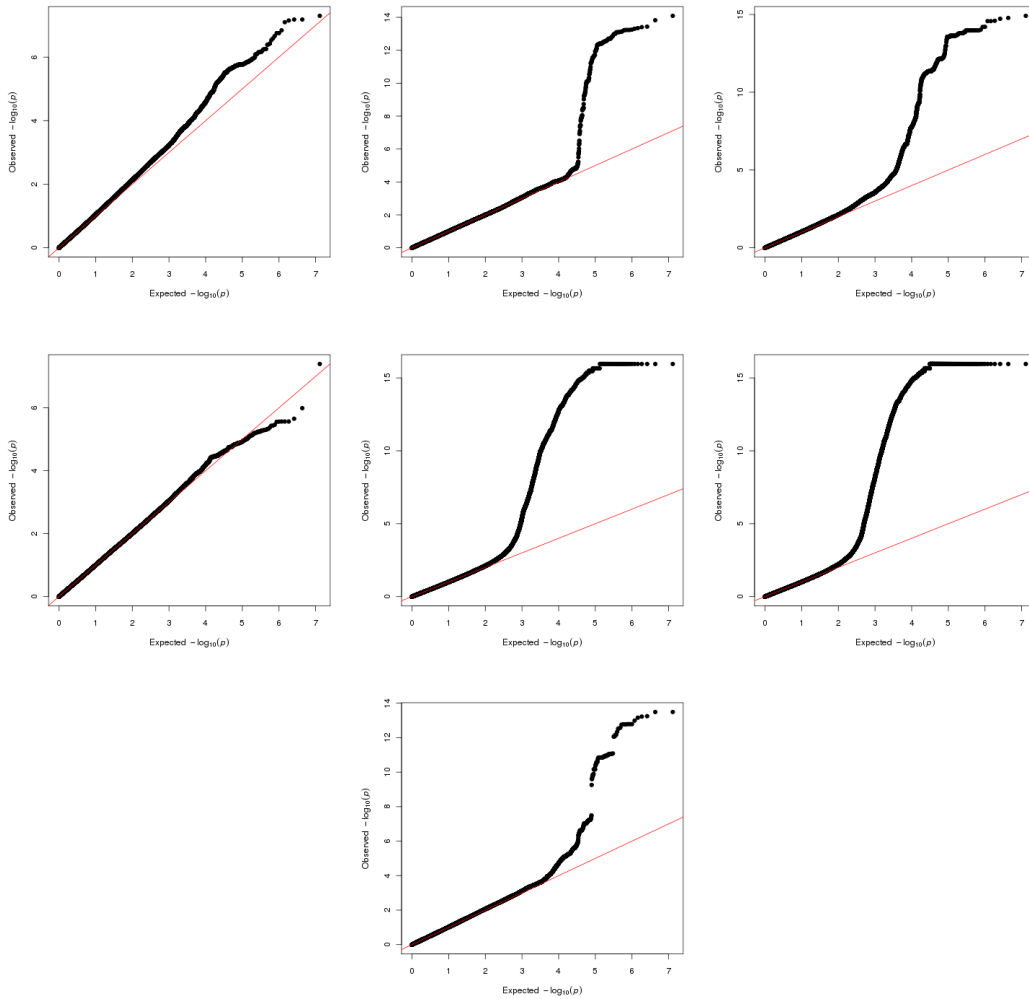

Supplementary Figure 5: ImpG-summary: Expected versus observed association statistics of for each of the 7 WTCCC phenotypes.

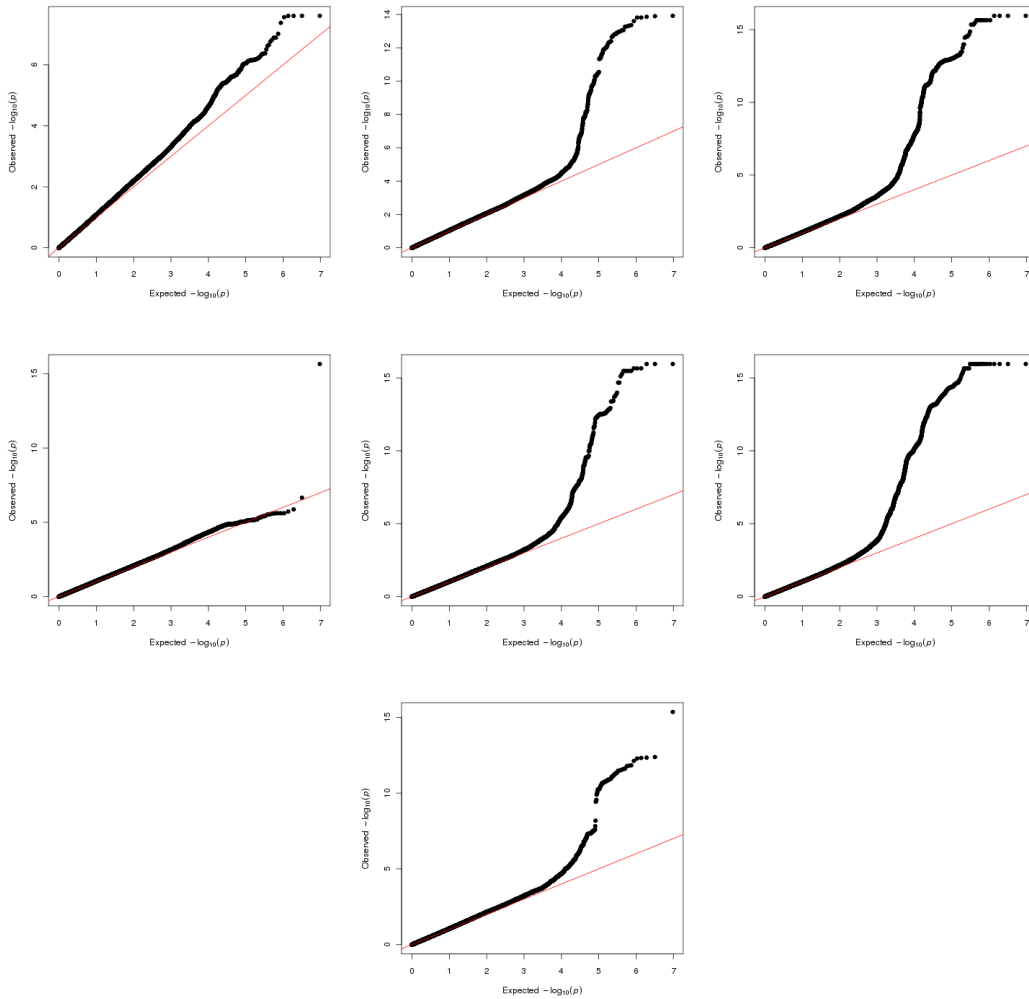

Supplementary Figure 6: Impute2: Expected versus observed association statistics of for each of the 7 WTCCC phenotypes.



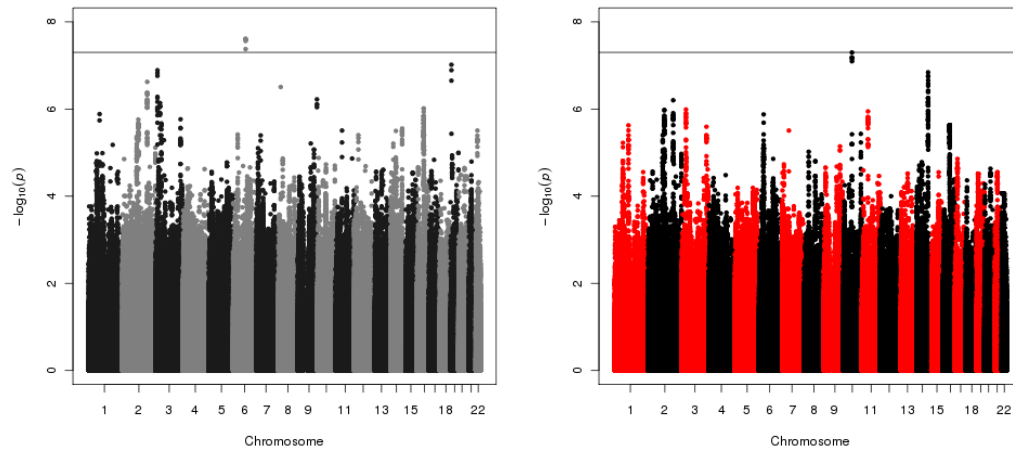

Supplementary Figure 7: Manhattan plot BD phenotype in WTCCC data. HMM(left), ImpG-Summary(right).

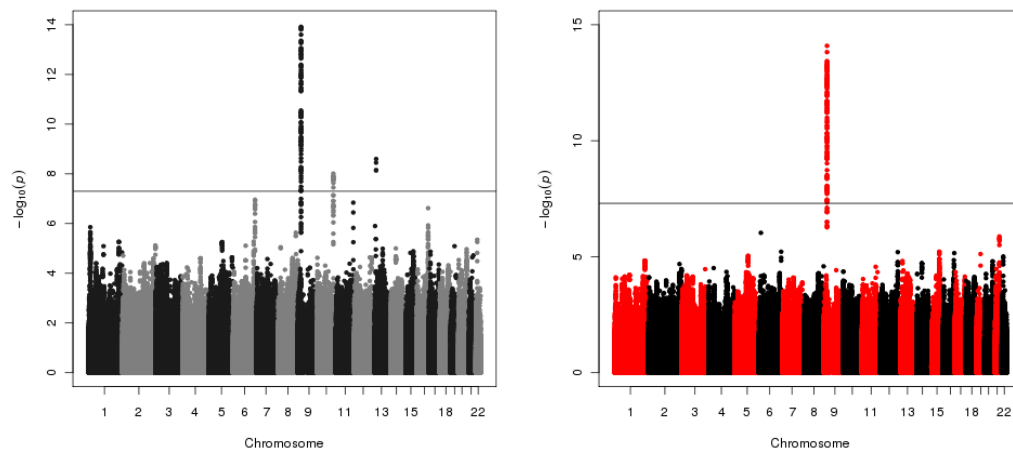

Supplementary Figure 8: Manhattan plot CAD phenotype in WTCCC data. HMM(left), ImpG-Summary(right).

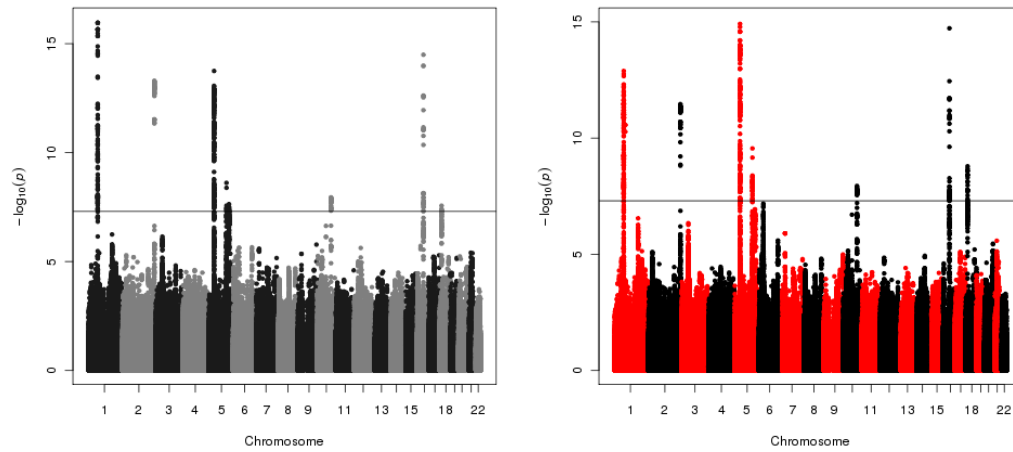

Supplementary Figure 9: Manhattan plot CD phenotype in WTCCC data. HMM(left), ImpG-Summary(right).

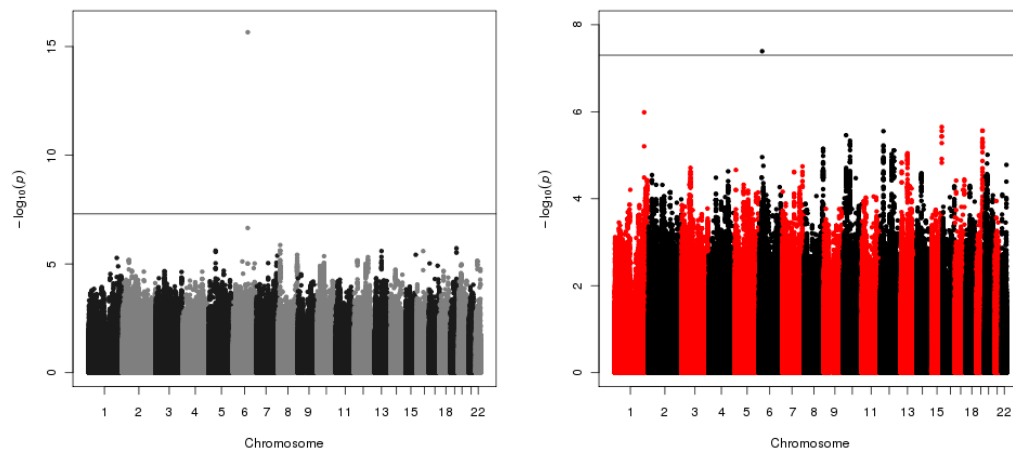

Supplementary Figure 10: Manhattan plot HT phenotype in WTCCC data. HMM(left), ImpG-Summary(right).

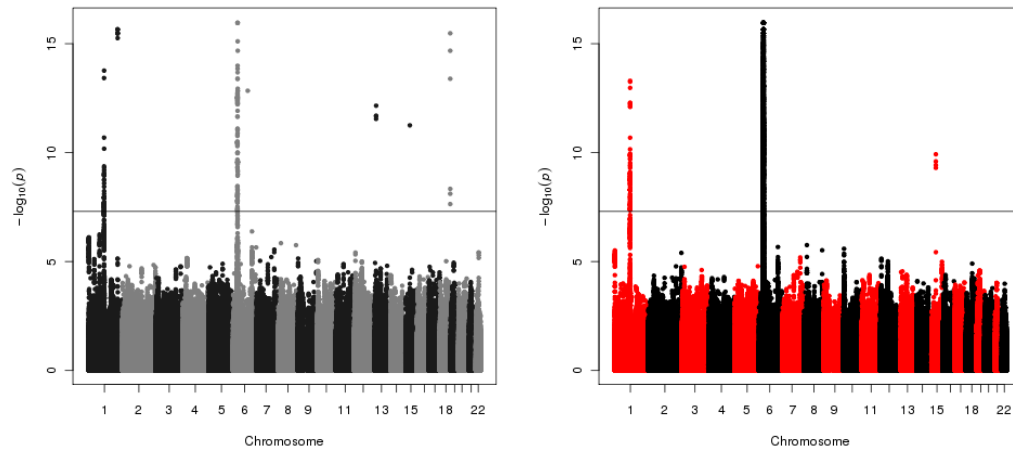

Supplementary Figure 11: Manhattan plot RA phenotype in WTCCC data. HMM(left), ImpG-Summary(right).

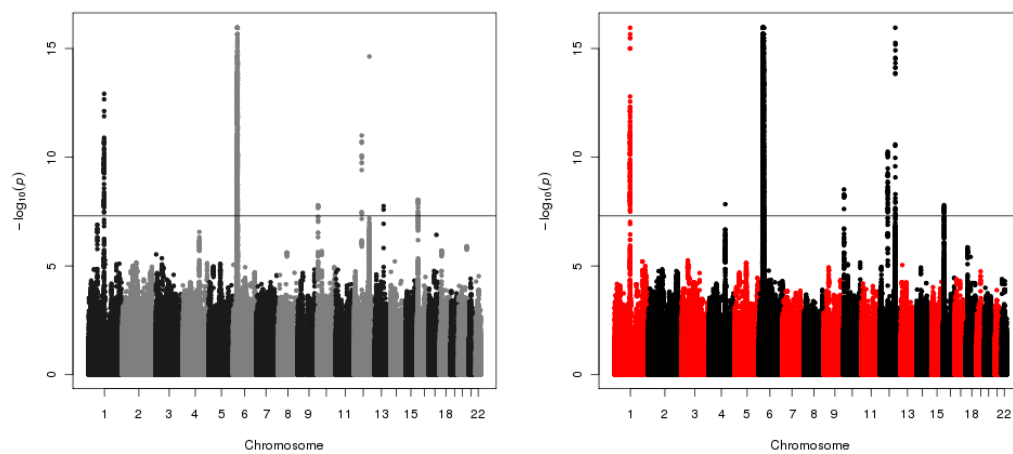

Supplementary Figure 12: Manhattan plot T1D phenotype in WTCCC data. HMM(left), ImpG-Summary(right).

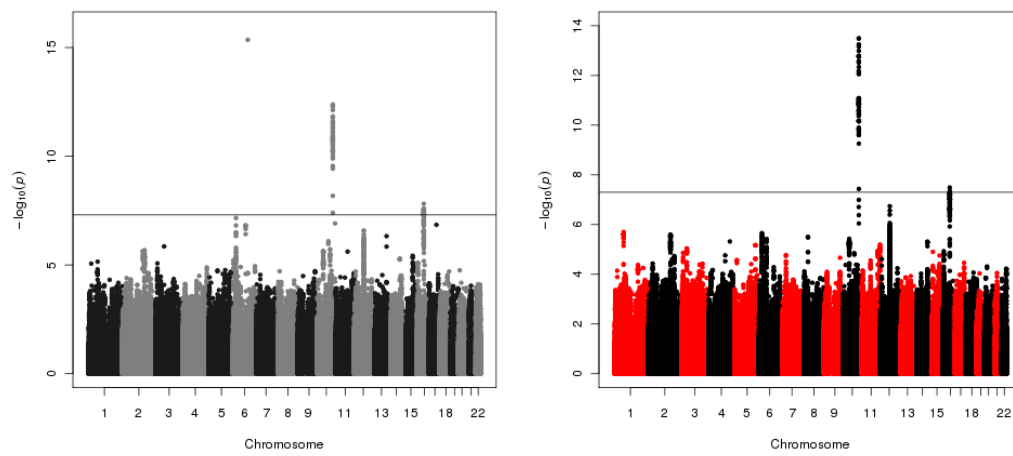

Supplementary Figure 13: Manhattan plot T2D phenotype in WTCCC data. HMM(left), ImpG-Summary(right).

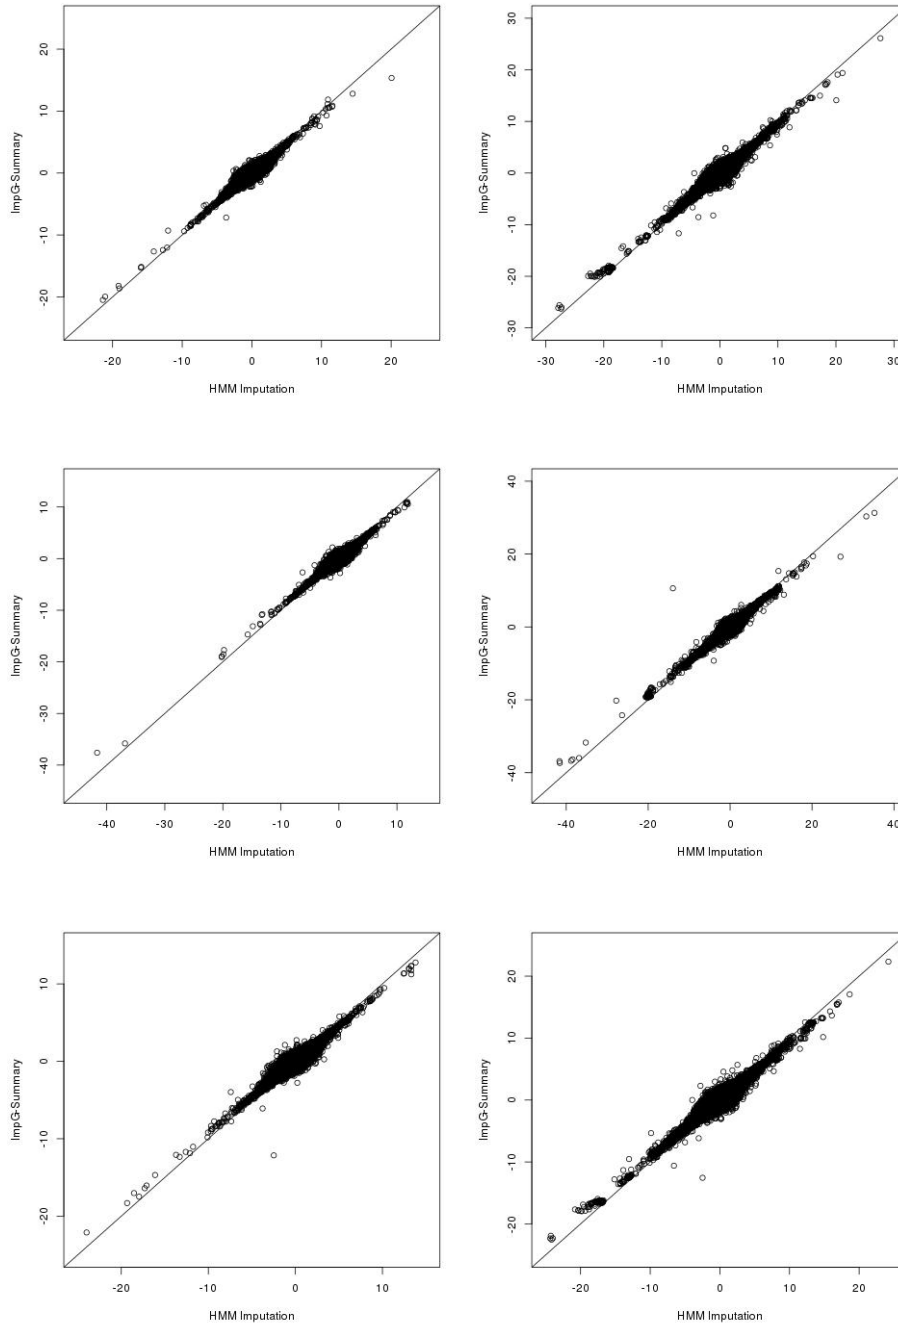

Supplementary Figure 14: HMM-imputed (x-axis) versus ImpG-Summary (y-axis) association statistics (z-scores) for the LDL,HDL, and TC phenotypes. Left denotes imputation of 10% of the z-scores using the remaining 90% while right shows imputation results starting from all variants present on the Illumina 610 array.

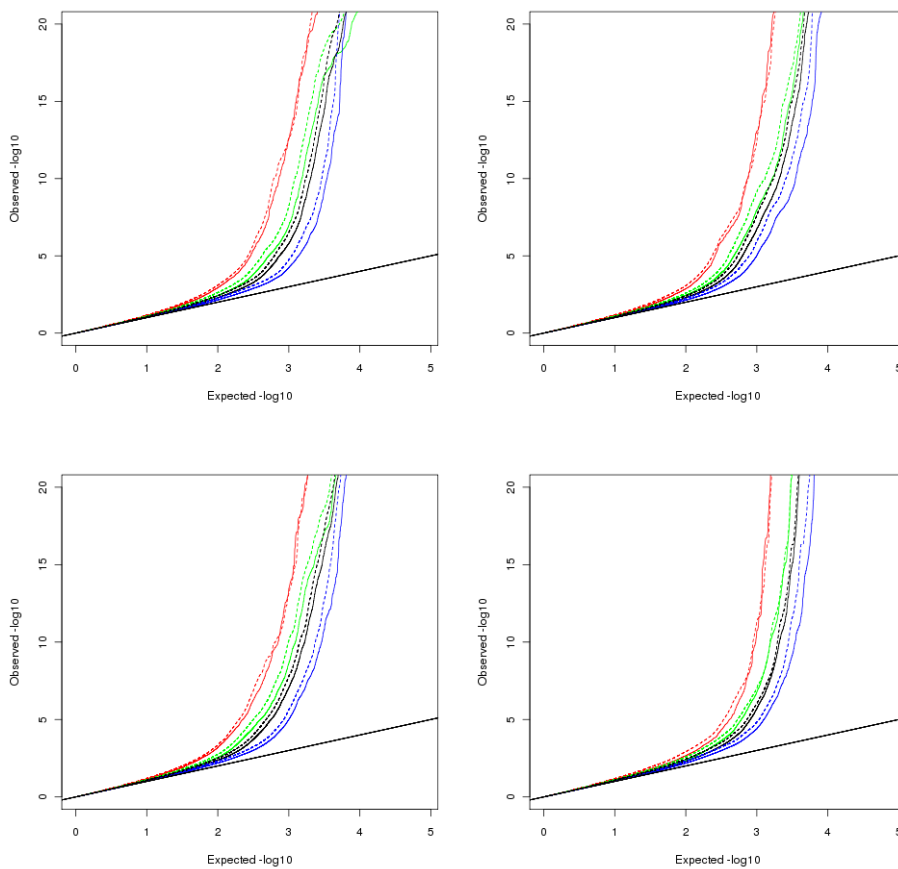

Supplementary Figure 15: QQ-plots for LDL,HDL, TC and TG phenotypes. Red denotes GENIC class, green the INTRON class, blue the INTERGENIC class with black denoting results at all SNP set. Dashed lines for ImpG-Summary 1000 Genomes imputed data with solid lines for original data.
